# Supplementary material for: Methimazolyl based diptych bicyclo-[3.3.0]-ruthenaboratranes
Source: Royal Society of Chemistry journal article supplement (doi:10.1039/c8dt04813d), 2019-01-01

**Methimazolyl Based Diptych Bicyclo-[3.3.0]-Ruthenaboratranes**

Chenxi Ma<sup>a</sup> and Anthony F. Hill<sup>\*a</sup>

**Figure S1. Comparison of the methyl regions in the <sup>1</sup>H NMR spectra of 13, 14 and the decomposition spectrum of 13 in CDCl<sub>3</sub> to identify isomer 13x**

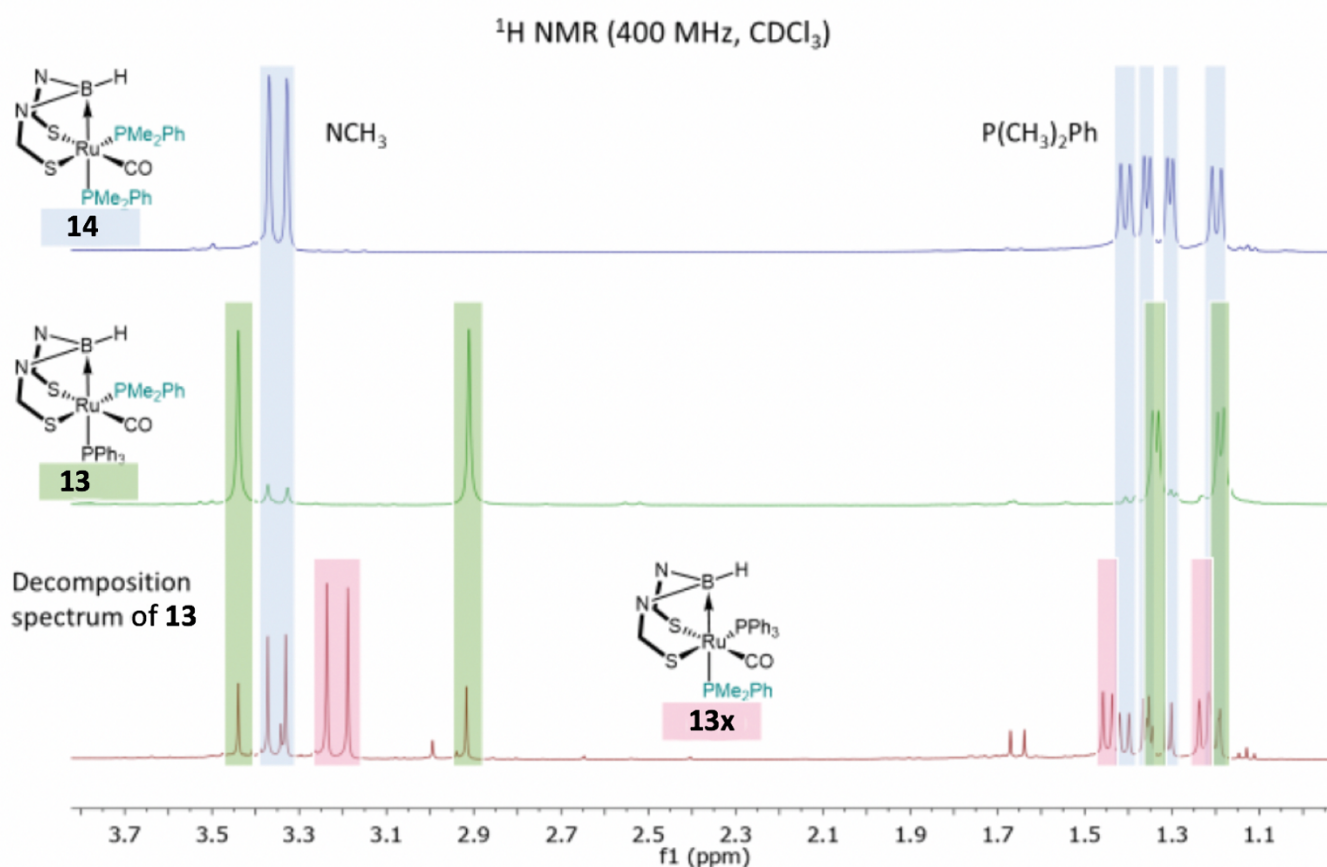

# [Ru{BH(mt)<sub>2</sub>}(CO)(PPh<sub>3</sub>)<sub>2</sub>] (5)

## <sup>1</sup>H NMR Spectrum of Complex 5

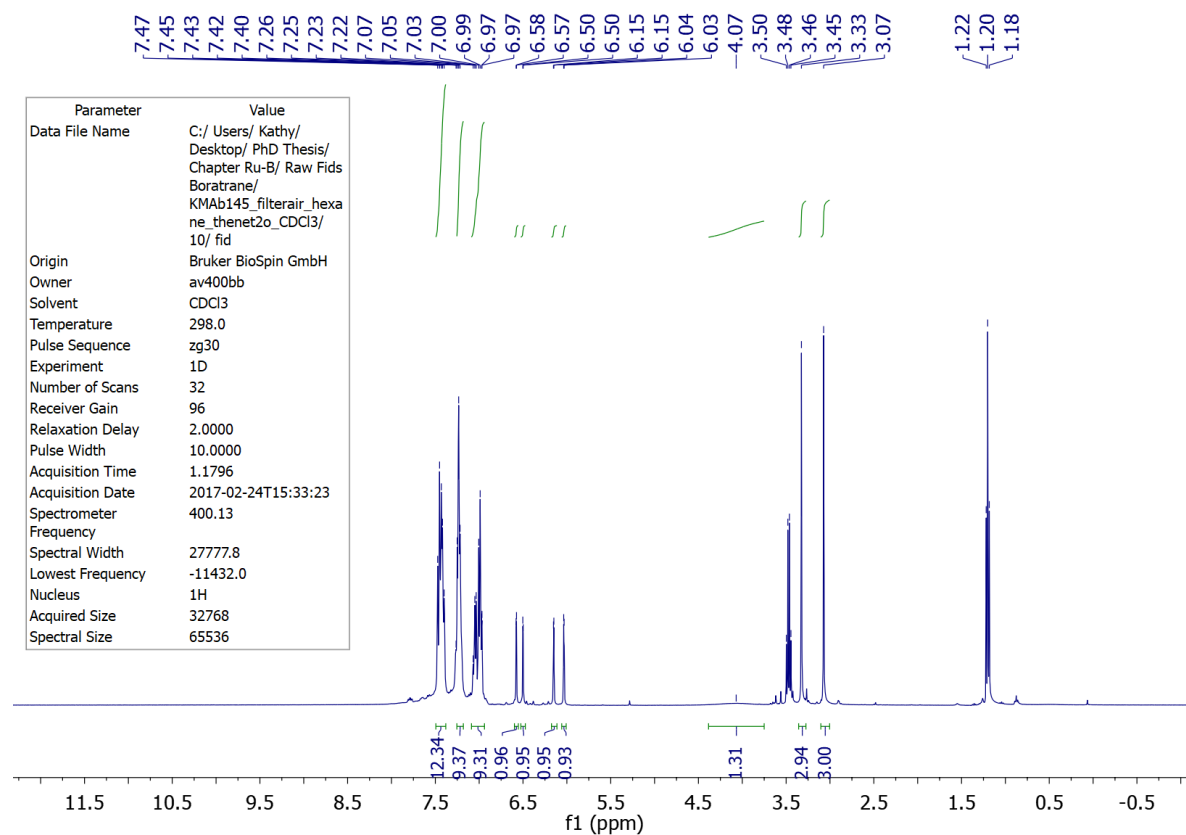

## <sup>13</sup>C{<sup>1</sup>H} NMR Spectrum of Complex 5

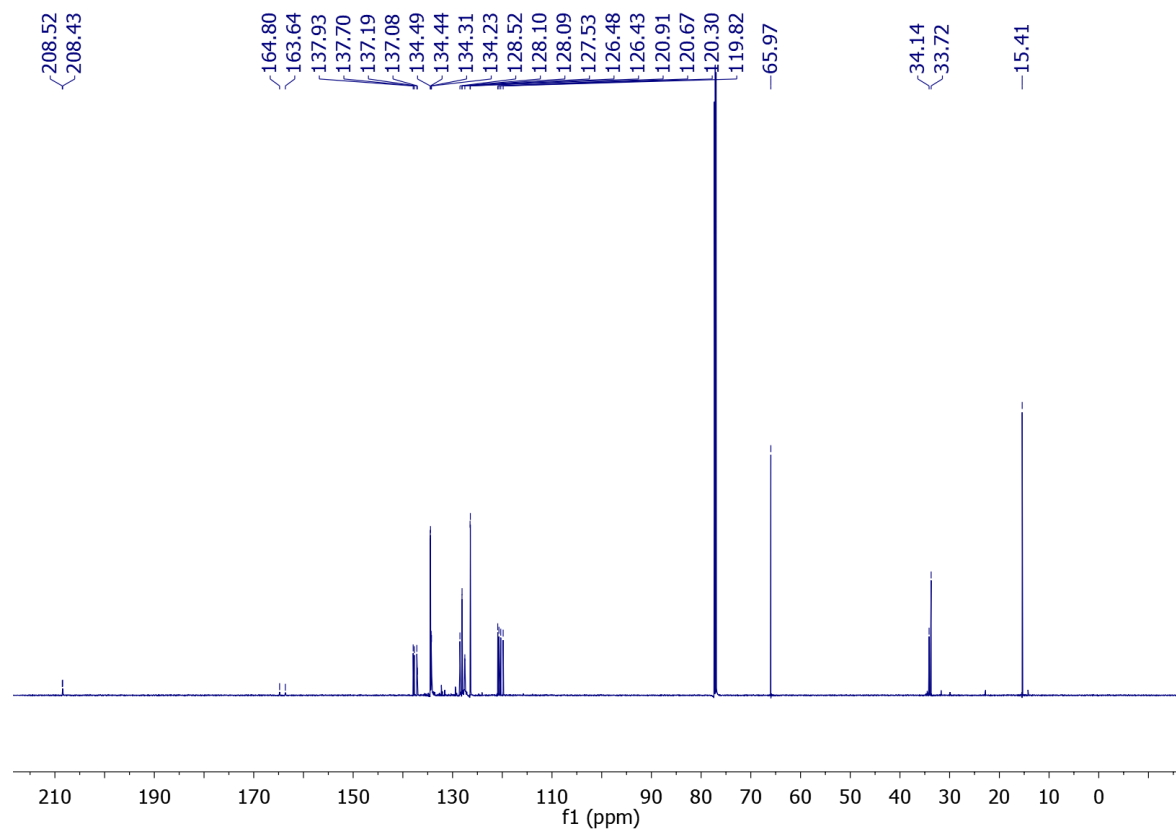

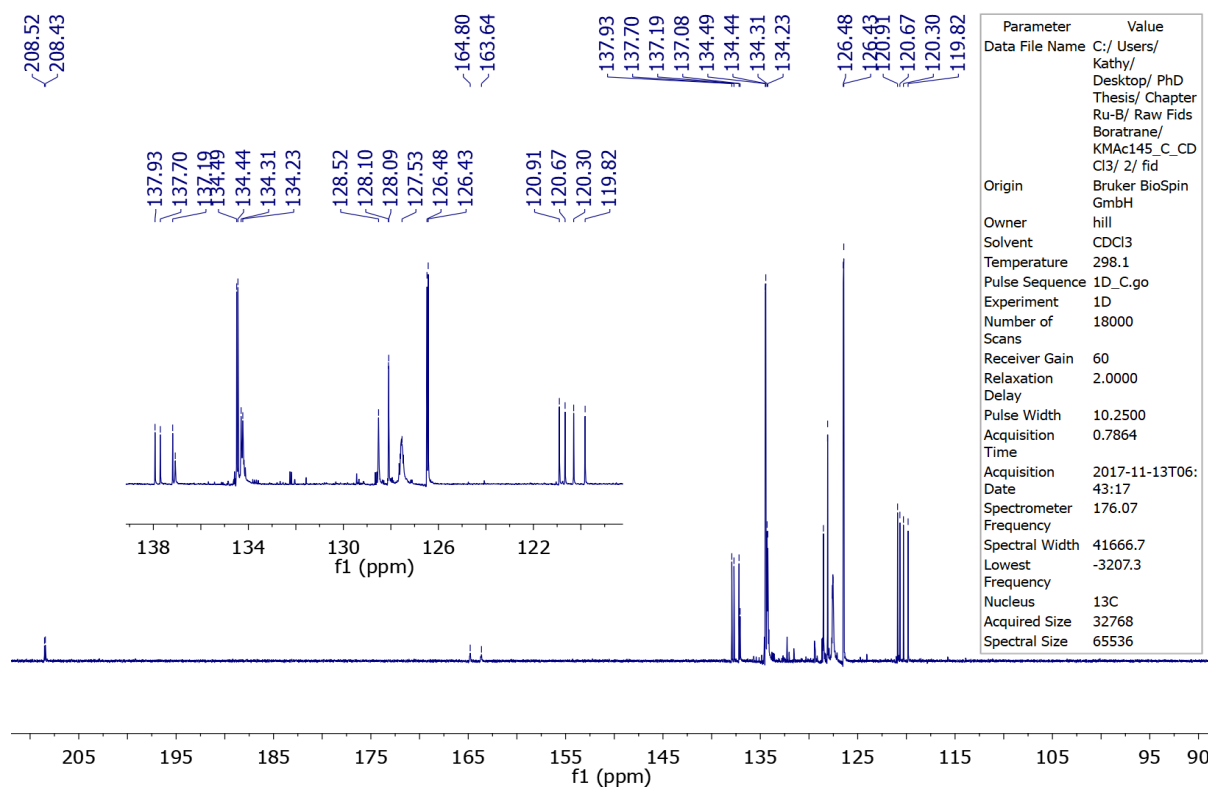

### <sup>31</sup>P{<sup>1</sup>H} NMR Spectrum of Complex 5

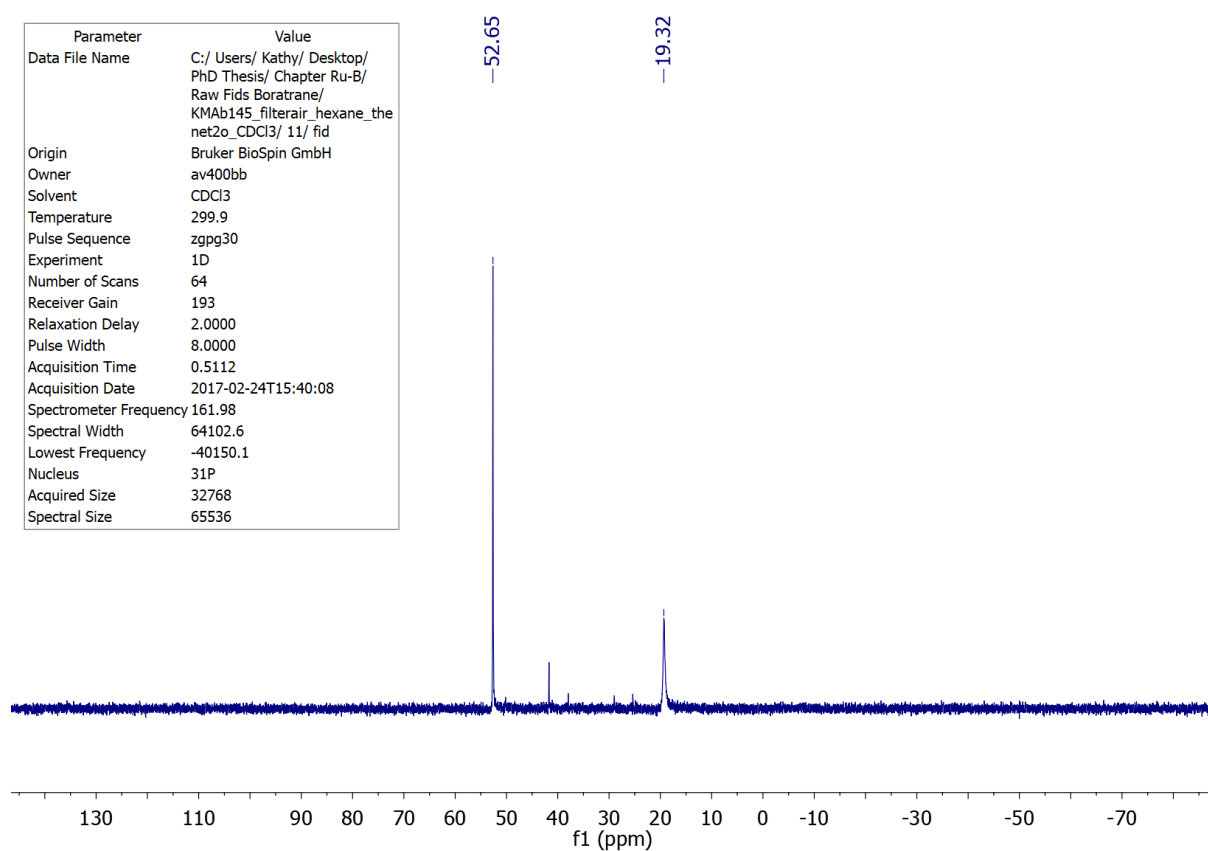

### $^{11}\text{B}\{^1\text{H}\}$ NMR Spectrum of Complex 5

| Parameter              | Value                                                                                                                      |
|------------------------|----------------------------------------------------------------------------------------------------------------------------|
| Data File Name         | C:/ Users/ Kathy/ Desktop/ PhD Thesis/ Chapter Ru-B/ Raw Fids Boratrane/ KMAB145_filterair_hexane_ thenet2o_CDCl3/ 13/ fid |
| Origin                 | Bruker BioSpin GmbH                                                                                                        |
| Owner                  | av400bb                                                                                                                    |
| Solvent                | CDCl3                                                                                                                      |
| Temperature            | 300.0                                                                                                                      |
| Pulse Sequence         | zgpg                                                                                                                       |
| Experiment             | 1D                                                                                                                         |
| Number of Scans        | 200                                                                                                                        |
| Receiver Gain          | 193                                                                                                                        |
| Relaxation Delay       | 0.2000                                                                                                                     |
| Pulse Width            | 10.0000                                                                                                                    |
| Acquisition Time       | 1.2845                                                                                                                     |
| Acquisition Date       | 2017-02-24T19:01:46                                                                                                        |
| Spectrometer Frequency | 128.38                                                                                                                     |
| Spectral Width         | 25510.2                                                                                                                    |
| Lowest Frequency       | -12754.9                                                                                                                   |
| Nucleus                | 11B                                                                                                                        |
| Acquired Size          | 32768                                                                                                                      |
| Spectral Size          | 65536                                                                                                                      |

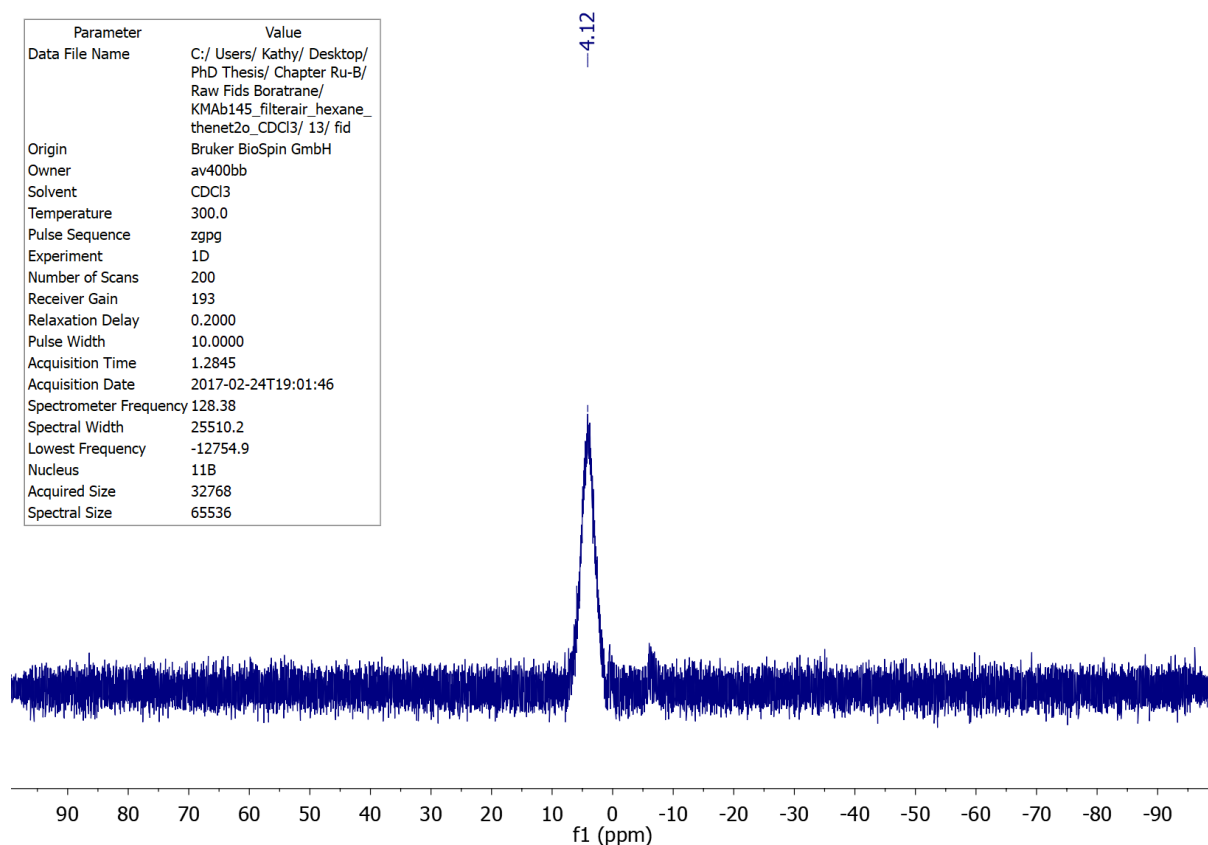

### $^{11}\text{B}$ NMR Spectrum of Complex 5

| Parameter              | Value                                                                                                                      |
|------------------------|----------------------------------------------------------------------------------------------------------------------------|
| Data File Name         | C:/ Users/ Kathy/ Desktop/ PhD Thesis/ Chapter Ru-B/ Raw Fids Boratrane/ KMAB145_filterair_hexane_ thenet2o_CDCl3/ 12/ fid |
| Origin                 | Bruker BioSpin GmbH                                                                                                        |
| Owner                  | av400bb                                                                                                                    |
| Solvent                | CDCl3                                                                                                                      |
| Temperature            | 300.0                                                                                                                      |
| Pulse Sequence         | zg                                                                                                                         |
| Experiment             | 1D                                                                                                                         |
| Number of Scans        | 200                                                                                                                        |
| Receiver Gain          | 193                                                                                                                        |
| Relaxation Delay       | 0.2000                                                                                                                     |
| Pulse Width            | 10.0000                                                                                                                    |
| Acquisition Time       | 1.2845                                                                                                                     |
| Acquisition Date       | 2017-02-24T18:55:05                                                                                                        |
| Spectrometer Frequency | 128.38                                                                                                                     |
| Spectral Width         | 25510.2                                                                                                                    |
| Lowest Frequency       | -12754.9                                                                                                                   |
| Nucleus                | 11B                                                                                                                        |
| Acquired Size          | 32768                                                                                                                      |
| Spectral Size          | 65536                                                                                                                      |

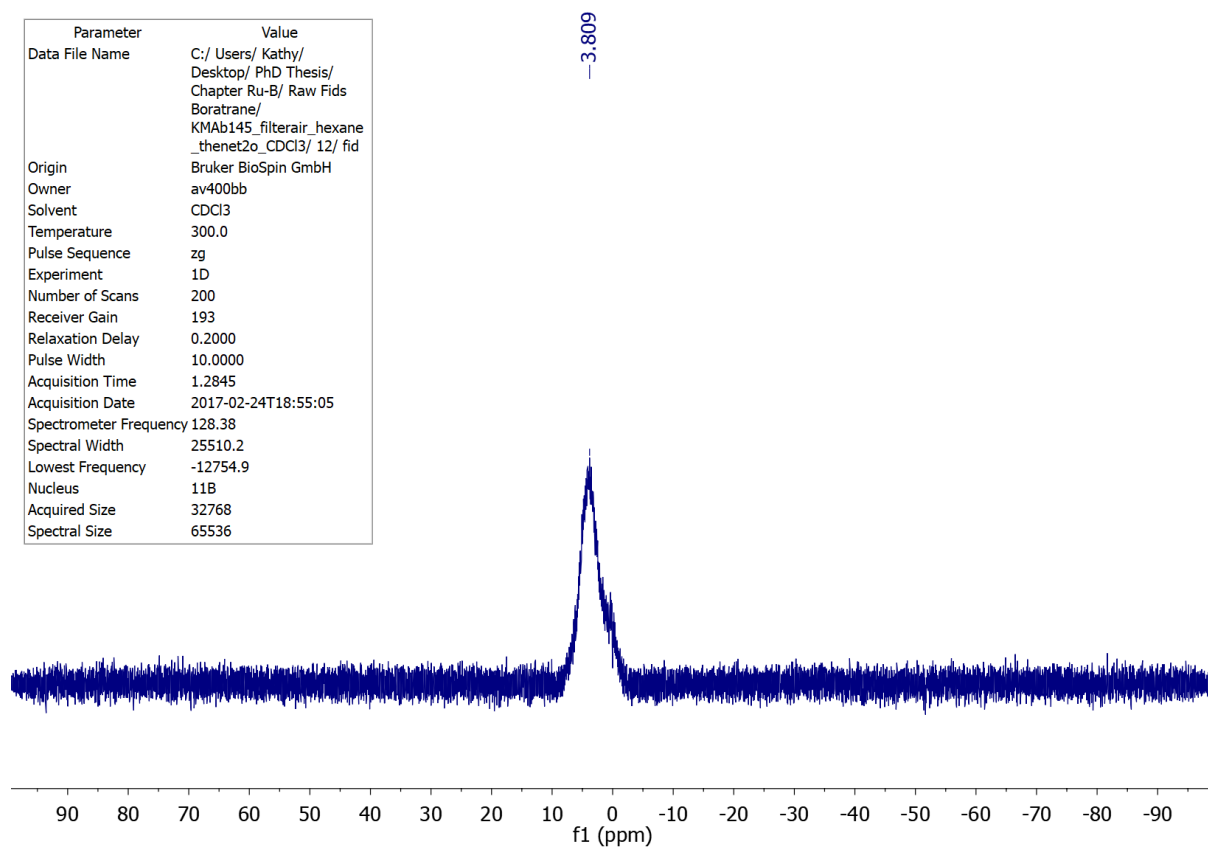

# [Ru{BH(mt)<sub>2</sub>}(CO)<sub>2</sub>(PPh<sub>3</sub>)] (12)

## <sup>1</sup>H NMR Spectrum of Complex 12

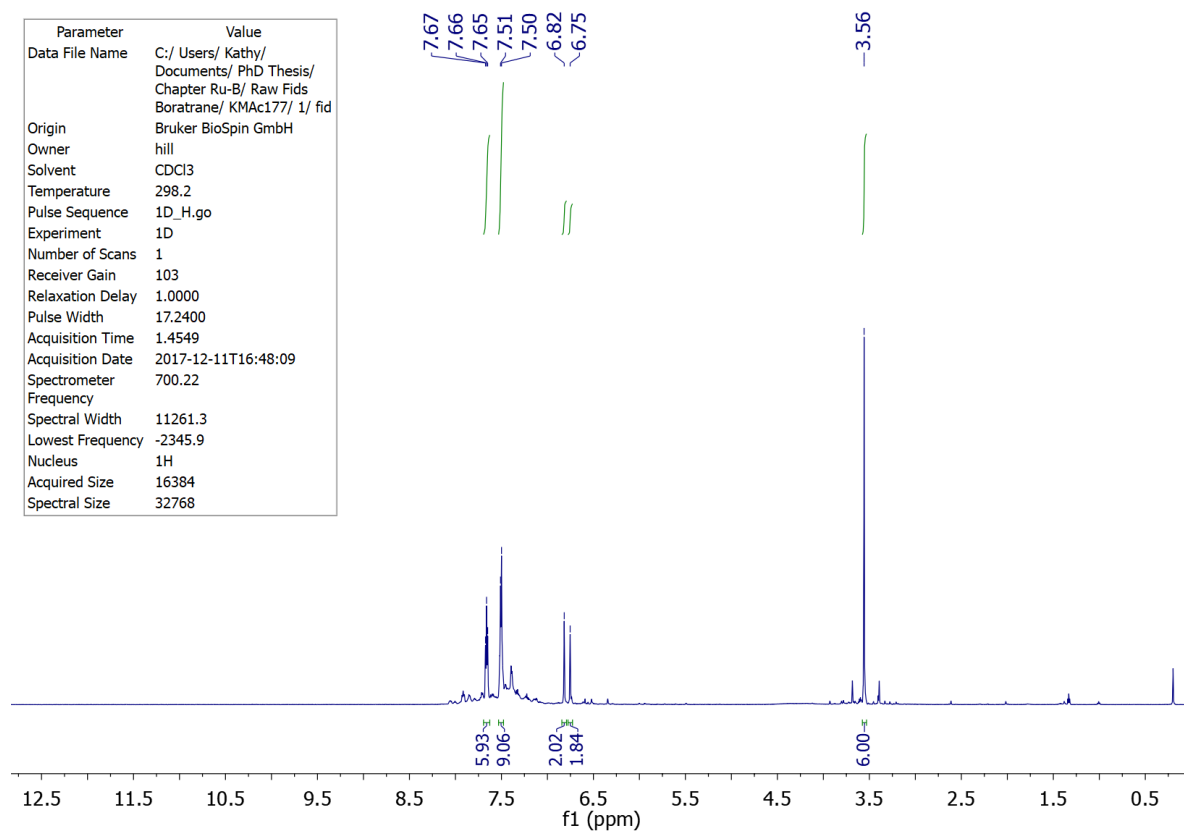

## <sup>13</sup>C{<sup>1</sup>H} NMR Spectrum of Complex 12

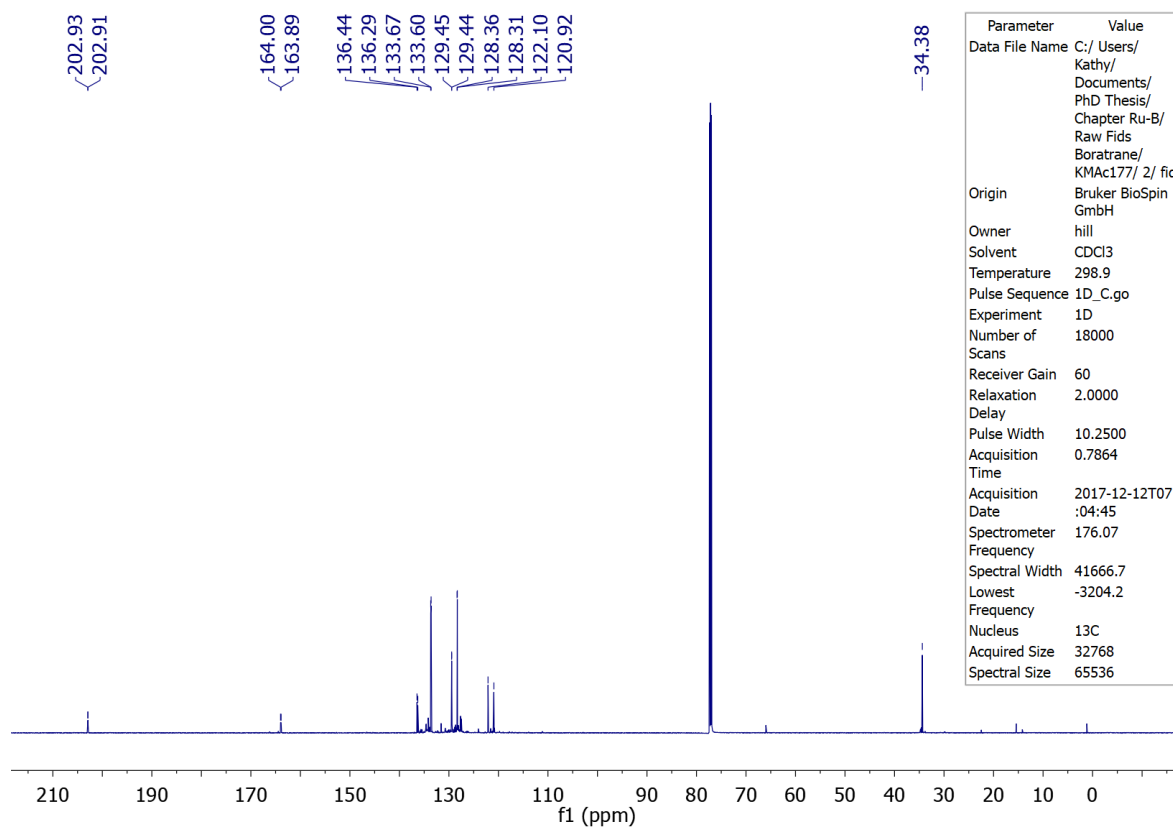

### $^{31}\text{P}\{^1\text{H}\}$ NMR Spectrum of Complex 12

| Parameter        | Value                                                                                            |
|------------------|--------------------------------------------------------------------------------------------------|
| Data File Name   | C:/Users/Kathy/Documents/PhD Thesis/Chapter Ru-B/ Raw Fids Boratrane/KMAc177_char_CDCl3/ 10/ fid |
| Origin           | Bruker BioSpin GmbH                                                                              |
| Owner            | av400bb                                                                                          |
| Solvent          | CDCl3                                                                                            |
| Temperature      | 298.0                                                                                            |
| Pulse Sequence   | zg30                                                                                             |
| Experiment       | 1D                                                                                               |
| Number of Scans  | 16                                                                                               |
| Receiver Gain    | 138                                                                                              |
| Relaxation Delay | 1.0000                                                                                           |
| Pulse Width      | 10.0000                                                                                          |
| Acquisition Time | 1.6384                                                                                           |
| Acquisition Date | 2018-01-29T15:05:35                                                                              |
| Spectrometer     | 400.13                                                                                           |
| Frequency        |                                                                                                  |
| Spectral Width   | 20000.0                                                                                          |
| Lowest Frequency | -12038.4                                                                                         |
| Nucleus          | $^1\text{H}$                                                                                     |
| Acquired Size    | 32768                                                                                            |
| Spectral Size    | 65536                                                                                            |

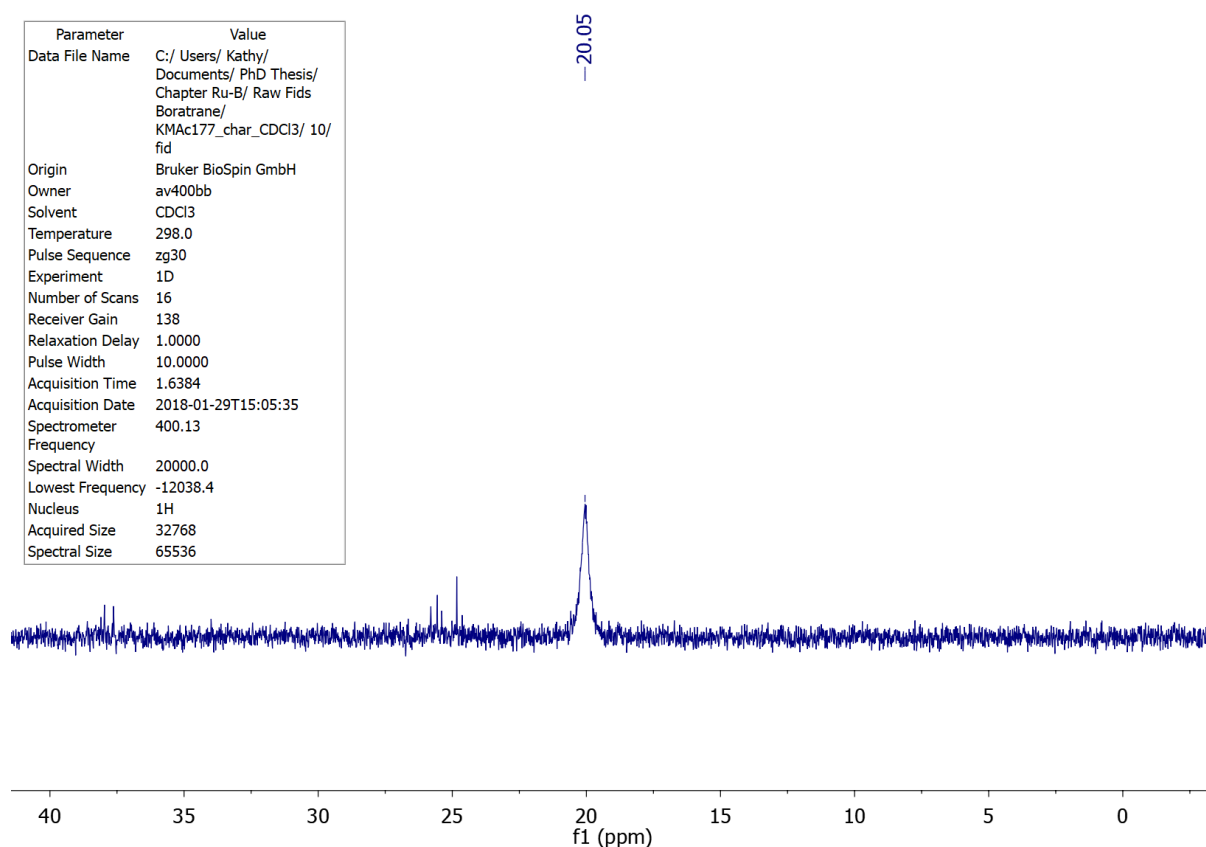

### $^{11}\text{B}$ NMR Spectrum of Complex 12

| Parameter        | Value                                                                                            |
|------------------|--------------------------------------------------------------------------------------------------|
| Data File Name   | C:/Users/Kathy/Documents/PhD Thesis/Chapter Ru-B/ Raw Fids Boratrane/KMAc177_char_CDCl3/ 12/ fid |
| Origin           | Bruker BioSpin GmbH                                                                              |
| Owner            | av400bb                                                                                          |
| Solvent          | CDCl3                                                                                            |
| Temperature      | 300.0                                                                                            |
| Pulse Sequence   | zg                                                                                               |
| Experiment       | 1D                                                                                               |
| Number of Scans  | 200                                                                                              |
| Receiver Gain    | 193                                                                                              |
| Relaxation Delay | 0.2000                                                                                           |
| Pulse Width      | 10.0000                                                                                          |
| Acquisition Time | 1.2845                                                                                           |
| Acquisition Date | 2018-01-29T15:21:00                                                                              |
| Spectrometer     | 128.38                                                                                           |
| Frequency        |                                                                                                  |
| Spectral Width   | 25510.2                                                                                          |
| Lowest Frequency | -12754.9                                                                                         |
| Frequency        |                                                                                                  |
| Nucleus          | $^{11}\text{B}$                                                                                  |
| Acquired Size    | 32768                                                                                            |
| Spectral Size    | 65536                                                                                            |

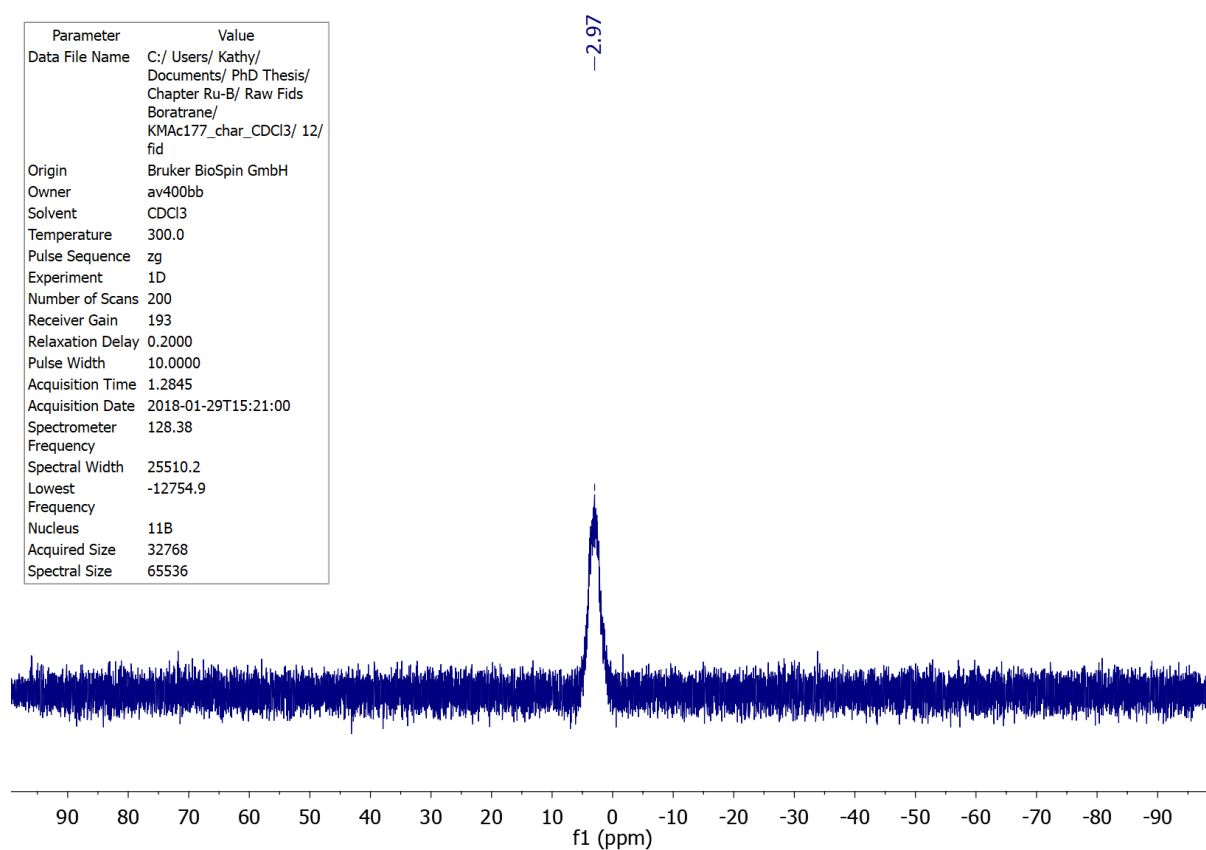

# [Ru{BH(mt)<sub>2</sub>}(CO)(PMe<sub>2</sub>Ph)(PPh<sub>3</sub>)] (13)

## <sup>1</sup>H NMR Spectrum of Complex 13 in CDCl<sub>3</sub>

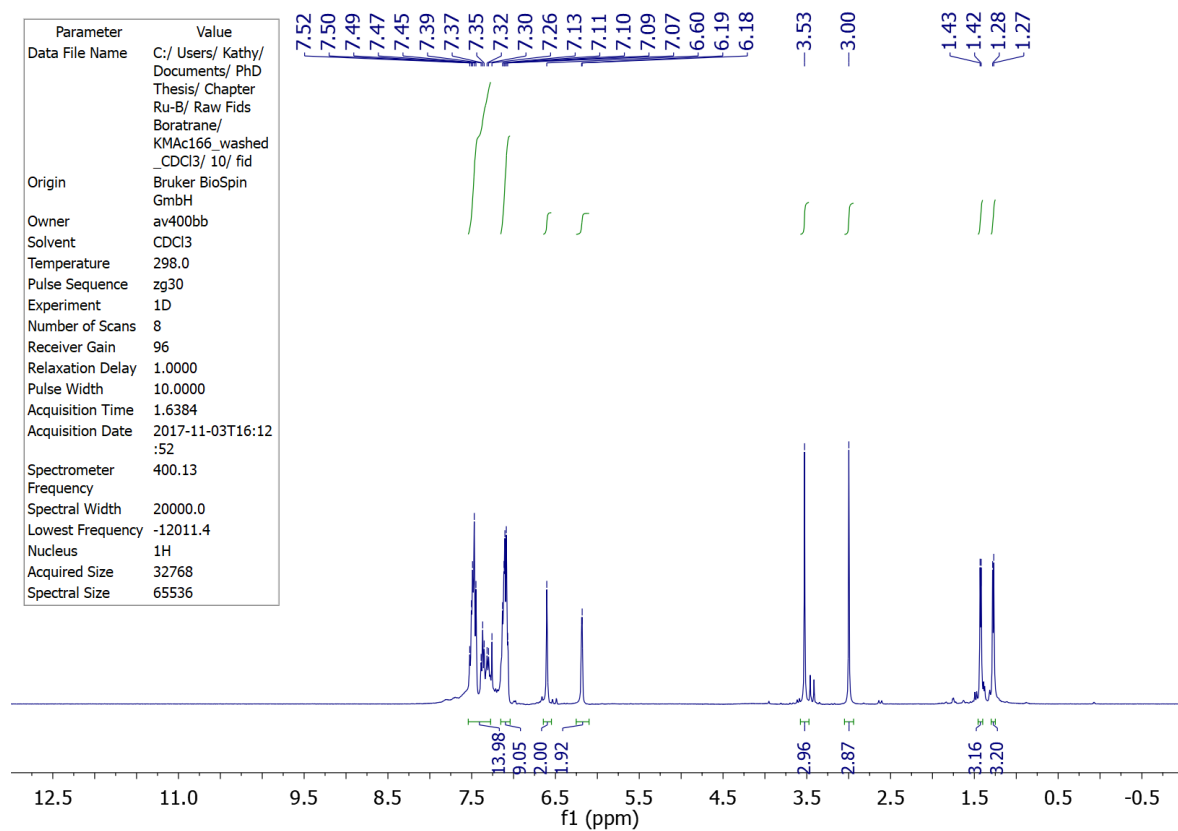

## <sup>31</sup>P{<sup>1</sup>H} NMR Spectrum of Complex 13 in CDCl<sub>3</sub>

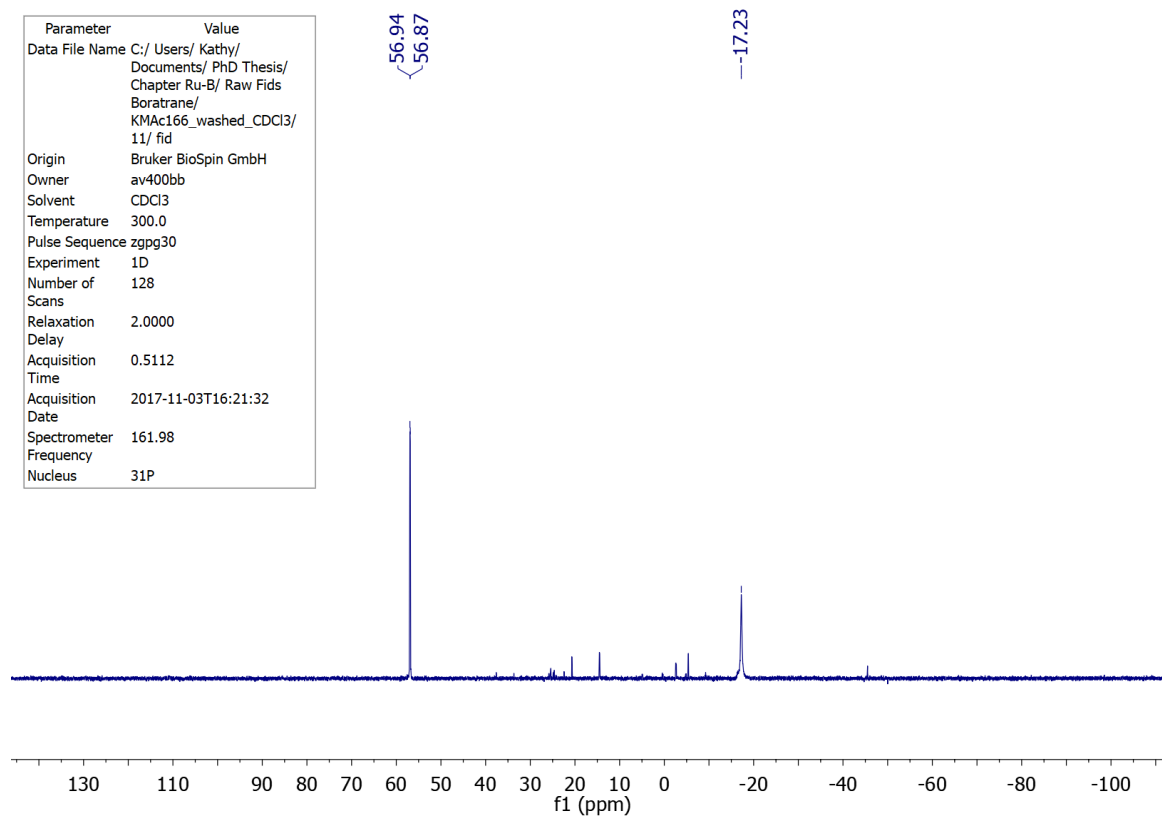

# $^{11}\text{B}\{^1\text{H}\}$ NMR Spectrum of Complex 13 in $\text{CDCl}_3$

| Parameter        | Value                                                                                       |
|------------------|---------------------------------------------------------------------------------------------|
| Data File Name   | C:/Users/Kathy/Documents/PhD Thesis/Chapter Ru-B/ Raw Fids/Boratrane/KMAc166_CDCl3/ 15/ fid |
| Origin           | Bruker BioSpin GmbH                                                                         |
| Owner            | av400bb                                                                                     |
| Solvent          | $\text{CDCl}_3$                                                                             |
| Temperature      | 300.0                                                                                       |
| Pulse Sequence   | zgpg                                                                                        |
| Experiment       | 1D                                                                                          |
| Number of Scans  | 200                                                                                         |
| Receiver Gain    | 193                                                                                         |
| Relaxation Delay | 0.2000                                                                                      |
| Pulse Width      | 10.0000                                                                                     |
| Acquisition Time | 1.2845                                                                                      |
| Acquisition Date | 2017-11-02T18:22:30                                                                         |
| Spectrometer     | 128.38                                                                                      |
| Frequency        |                                                                                             |
| Spectral Width   | 25510.2                                                                                     |
| Lowest Frequency | -12754.9                                                                                    |
| Nucleus          | $^{11}\text{B}$                                                                             |
| Acquired Size    | 32768                                                                                       |
| Spectral Size    | 65536                                                                                       |

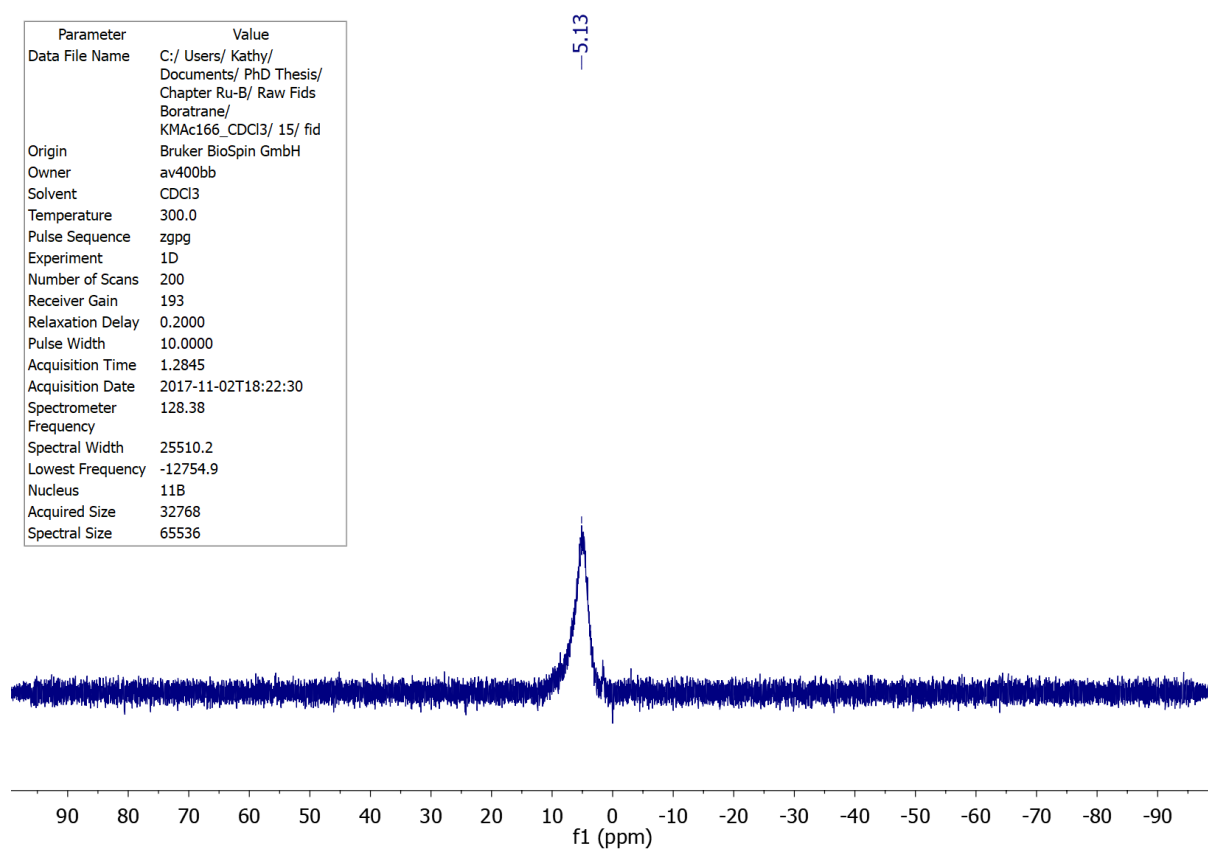



## NMR spectra in CD<sub>2</sub>Cl<sub>2</sub>

### <sup>1</sup>H NMR Spectrum of Complex 13

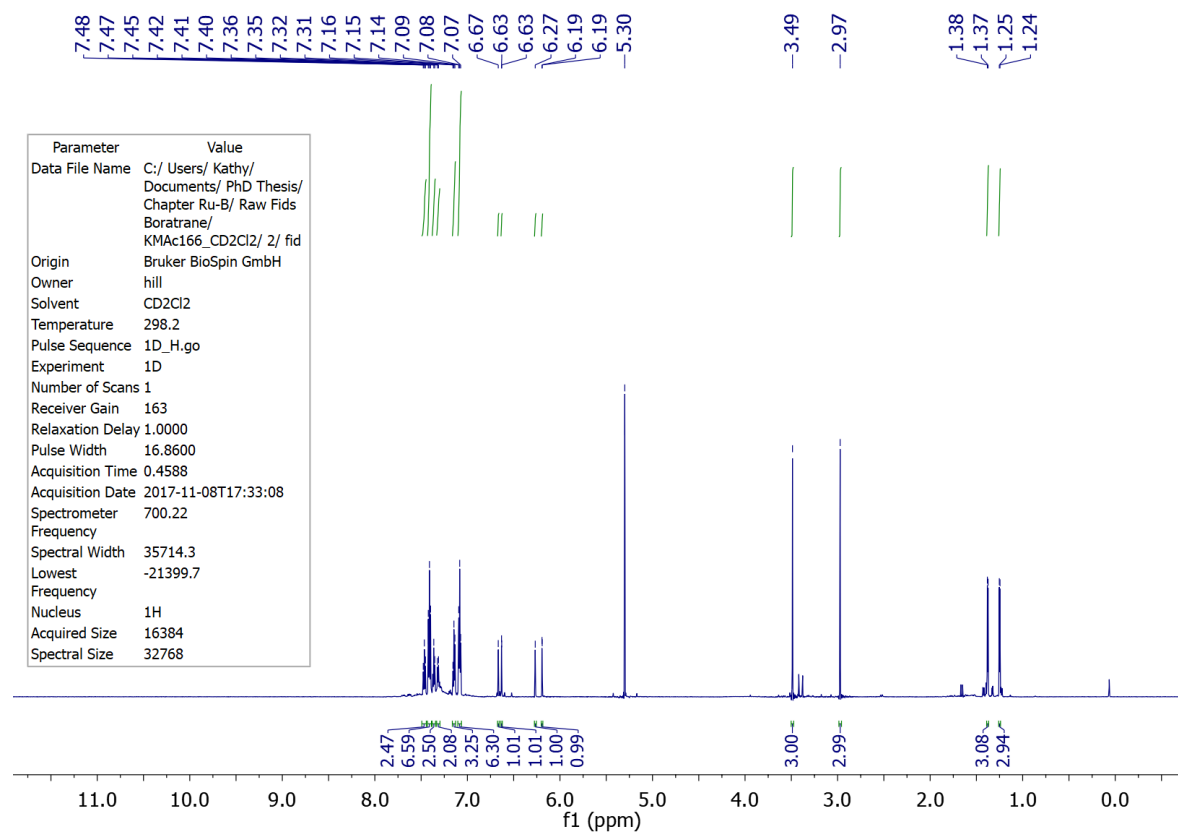

### <sup>31</sup>P NMR Spectrum of Complex 13

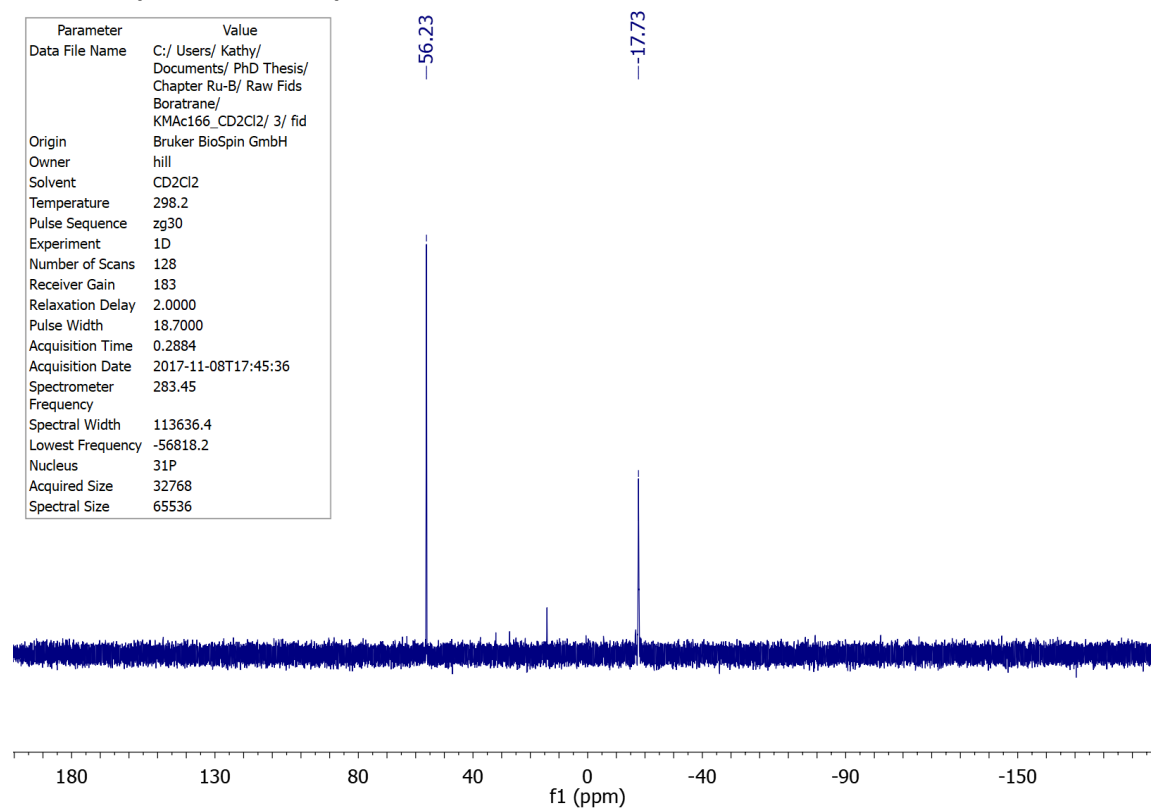

# [Ru{BH(mt)<sub>2</sub>}(CO)(PMe<sub>2</sub>Ph)<sub>2</sub>] (14)

## <sup>1</sup>H NMR Spectrum of Complex 14

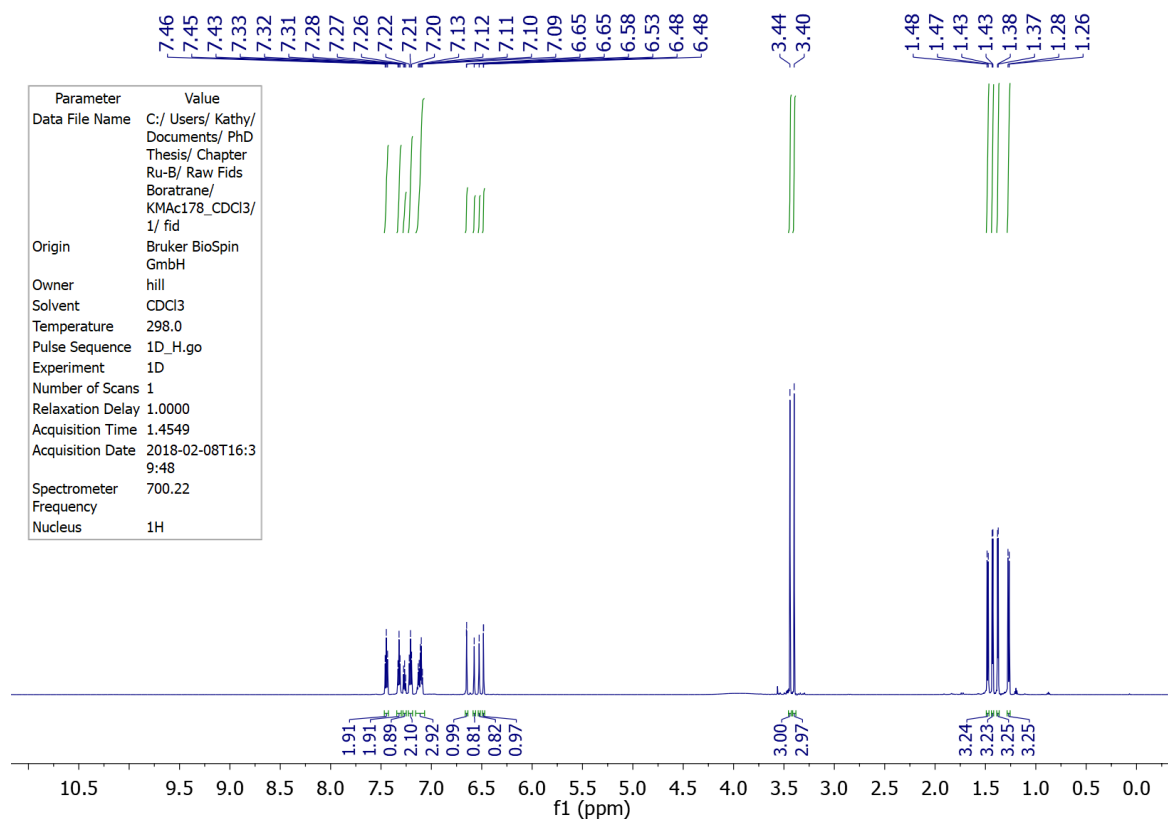

## <sup>13</sup>C{<sup>1</sup>H} NMR Spectrum of Complex 14

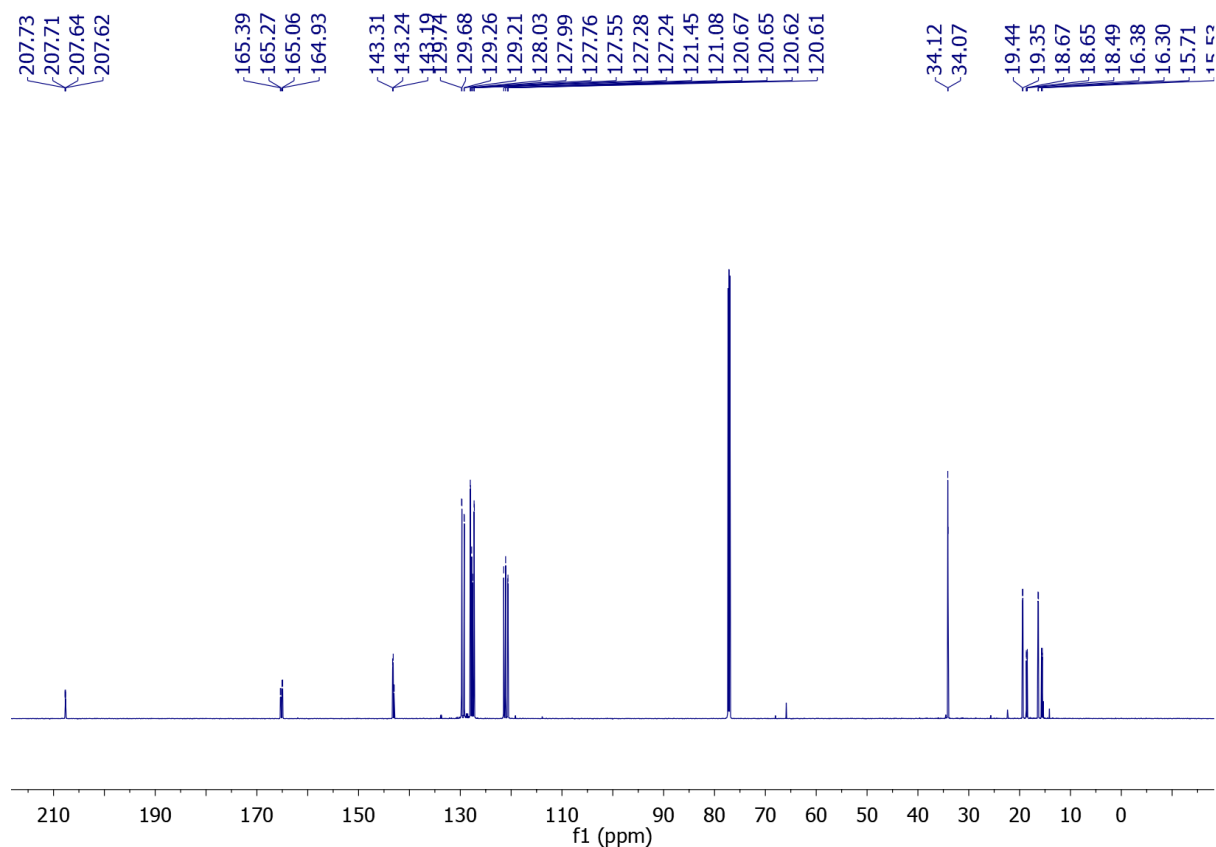

# Expansion of $^{13}\text{C}\{^1\text{H}\}$ NMR Spectrum of Complex 14

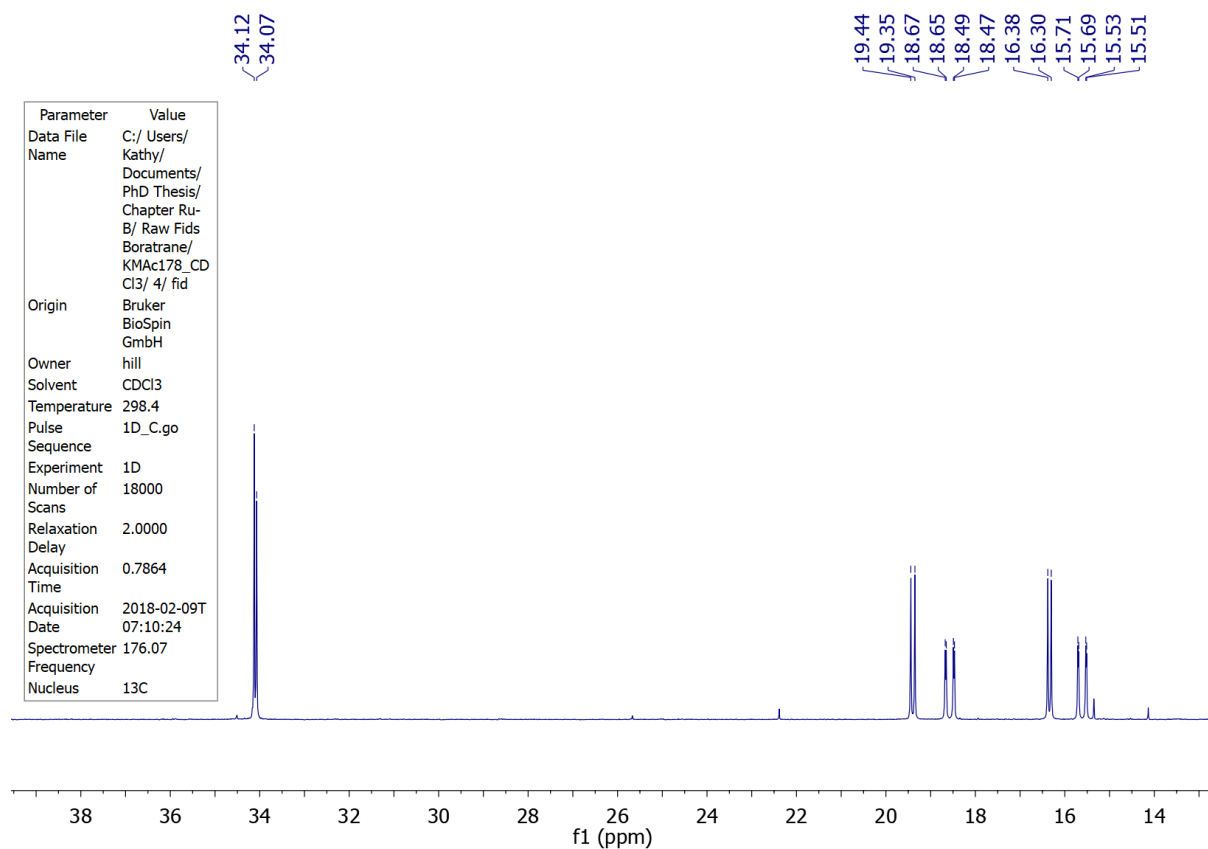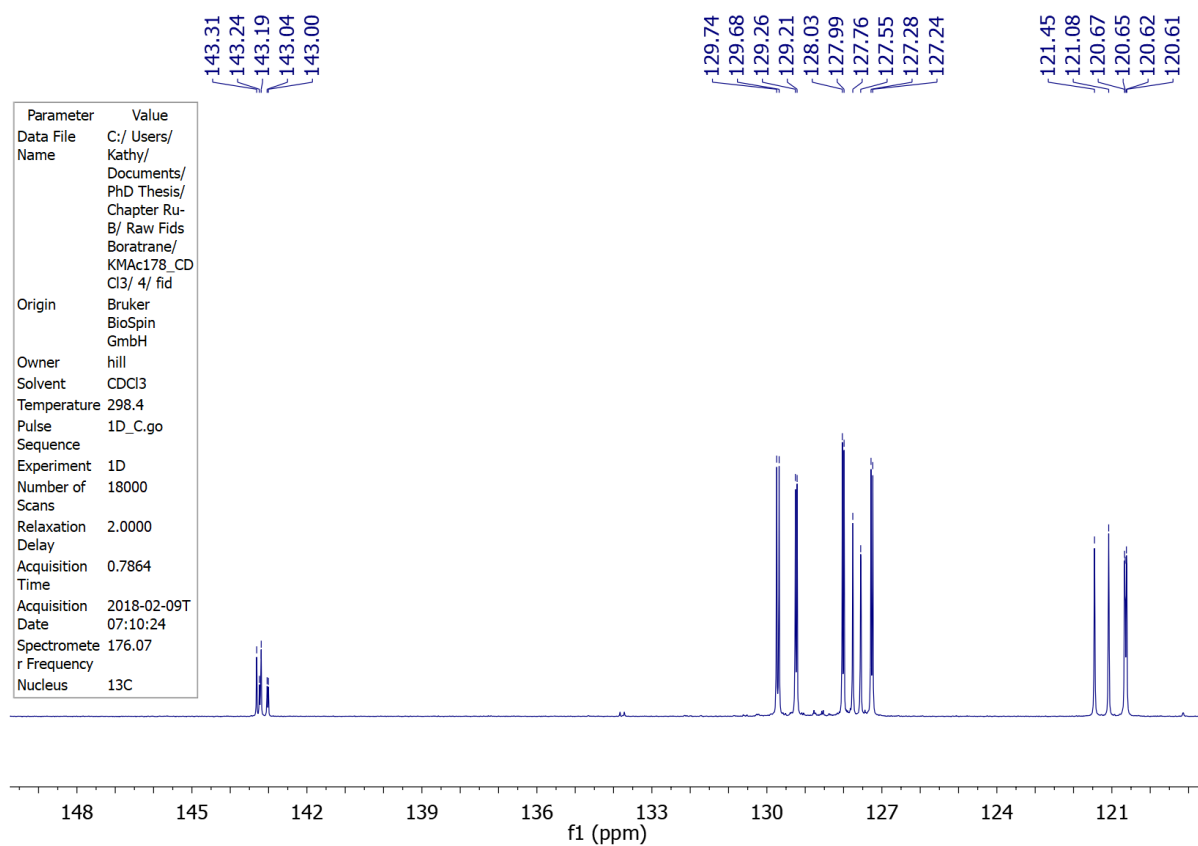

### $^{31}\text{P}\{^1\text{H}\}$ NMR Spectrum of Complex 14

| Parameter        | Value                                                                                   |
|------------------|-----------------------------------------------------------------------------------------|
| Data File Name   | C:/Users/Kathy/Documents/PhD Thesis/Chapter Ru-B/Raw Fids Boratrane/KMAc178_CDCl3/3/fid |
| Origin           | Bruker BioSpin GmbH                                                                     |
| Owner            | hill                                                                                    |
| Solvent          | CDCl3                                                                                   |
| Temperature      | 298.0                                                                                   |
| Pulse            | zgpg30                                                                                  |
| Sequence         |                                                                                         |
| Experiment       | 1D                                                                                      |
| Number of Scans  | 64                                                                                      |
| Relaxation Delay | 2.0000                                                                                  |
| Acquisition Time | 0.2884                                                                                  |
| Acquisition Date | 2018-02-08T16:53:24                                                                     |
| Spectrometer     | 283.45                                                                                  |
| Frequency        |                                                                                         |
| Nucleus          | 31P                                                                                     |

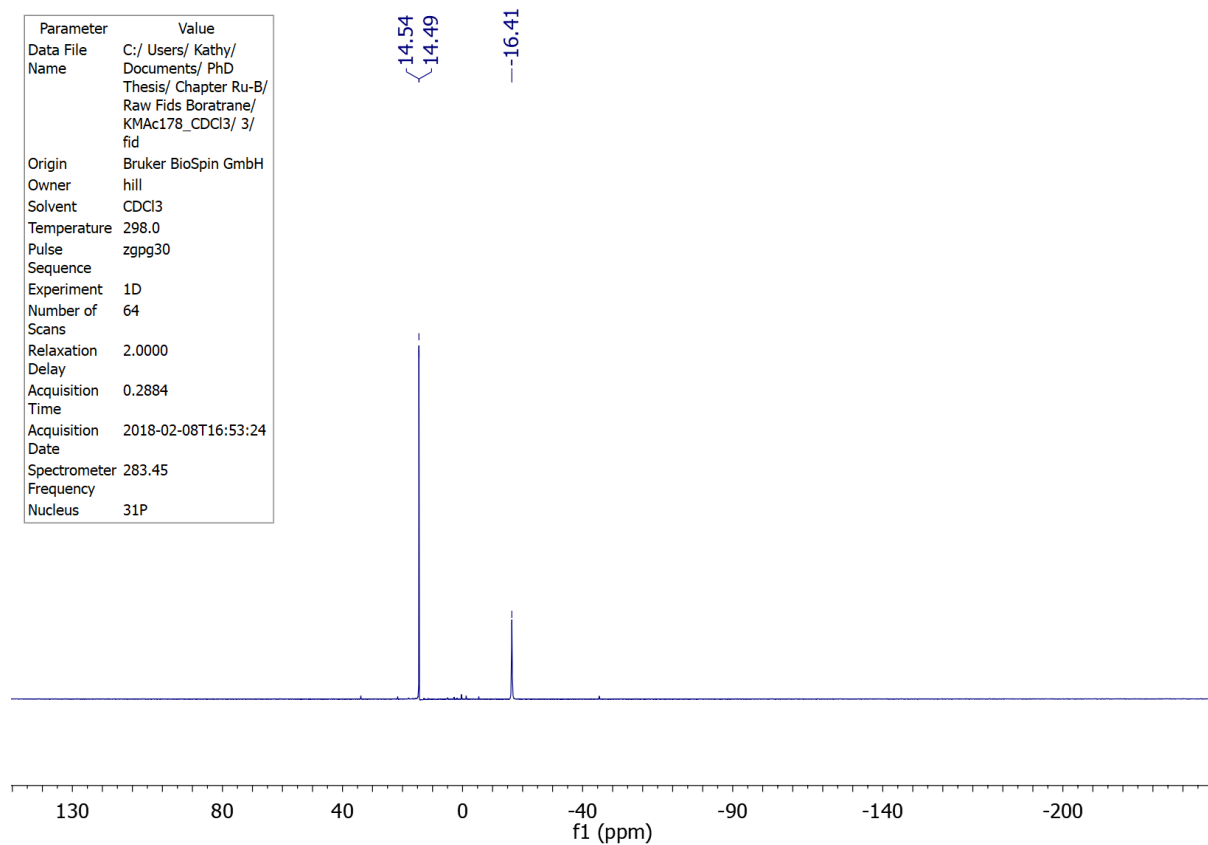

### $^{31}\text{P}$ NMR Spectrum of Complex 14

| Parameter        | Value                                                                                   |
|------------------|-----------------------------------------------------------------------------------------|
| Data File Name   | C:/Users/Kathy/Documents/PhD Thesis/Chapter Ru-B/Raw Fids Boratrane/KMAc178_CDCl3/2/fid |
| Origin           | Bruker BioSpin GmbH                                                                     |
| Owner            | hill                                                                                    |
| Solvent          | CDCl3                                                                                   |
| Temperature      | 298.0                                                                                   |
| Pulse Sequence   | zg30                                                                                    |
| Experiment       | 1D                                                                                      |
| Number of Scans  | 128                                                                                     |
| Relaxation Delay | 2.0000                                                                                  |
| Acquisition Time | 0.2884                                                                                  |
| Acquisition Date | 2018-02-08T16:47:31                                                                     |
| Spectrometer     | 283.45                                                                                  |
| Frequency        |                                                                                         |
| Nucleus          | 31P                                                                                     |

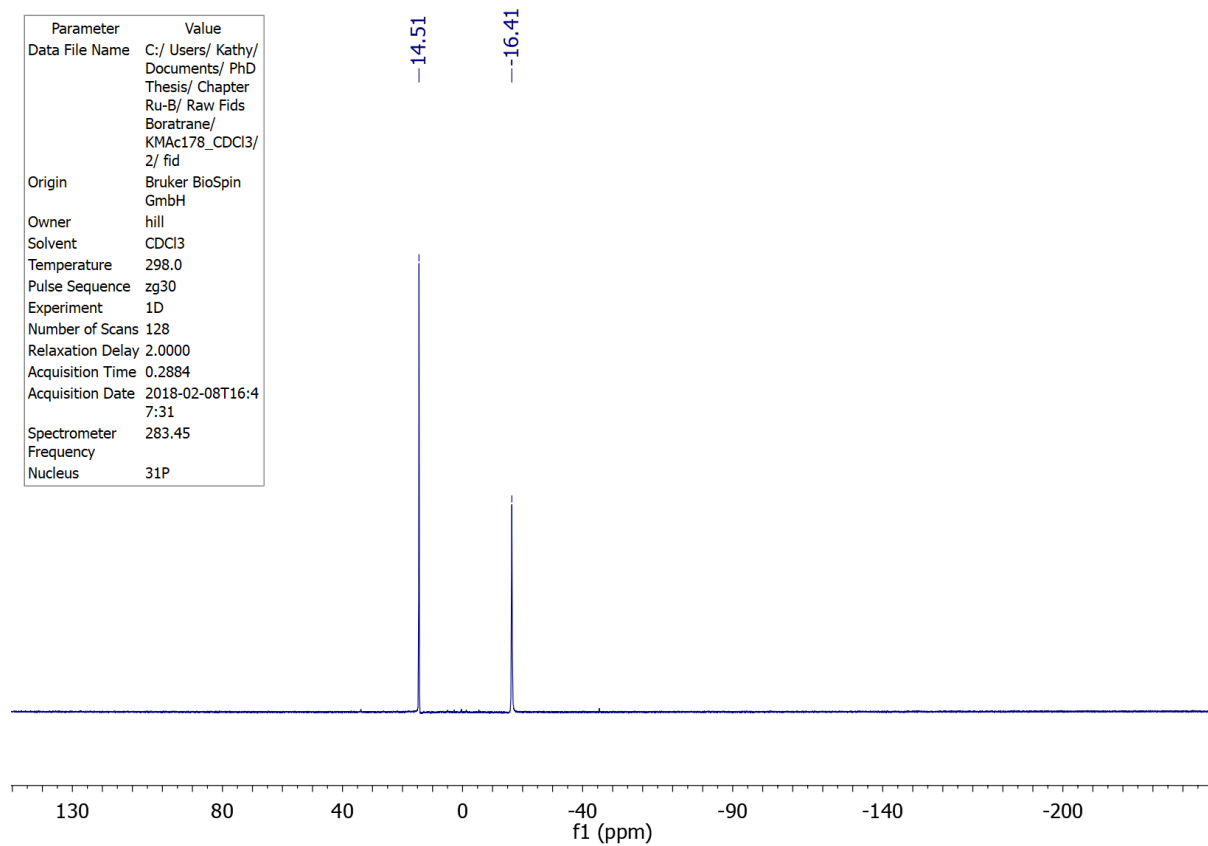

# <sup>11</sup>B NMR Spectrum of Complex 14

| Parameter        | Value                                                                                            |
|------------------|--------------------------------------------------------------------------------------------------|
| Data File Name   | C:/Users/Kathy/Documents/PhD Thesis/Chapter Ru-B/ Raw Fids Boratrane/KMAc178_boron_CDCl3/12/ fid |
| Origin           | Bruker BioSpin GmbH                                                                              |
| Owner            | av400bb                                                                                          |
| Solvent          | CDCl3                                                                                            |
| Temperature      | 300.0                                                                                            |
| Pulse Sequence   | zg                                                                                               |
| Experiment       | 1D                                                                                               |
| Number of Scans  | 200                                                                                              |
| Relaxation Delay | 0.2000                                                                                           |
| Acquisition Time | 1.2845                                                                                           |
| Acquisition Date | 2018-02-09T09:10:29                                                                              |
| Spectrometer     | 128.38                                                                                           |
| Frequency        |                                                                                                  |
| Nucleus          | 11B                                                                                              |

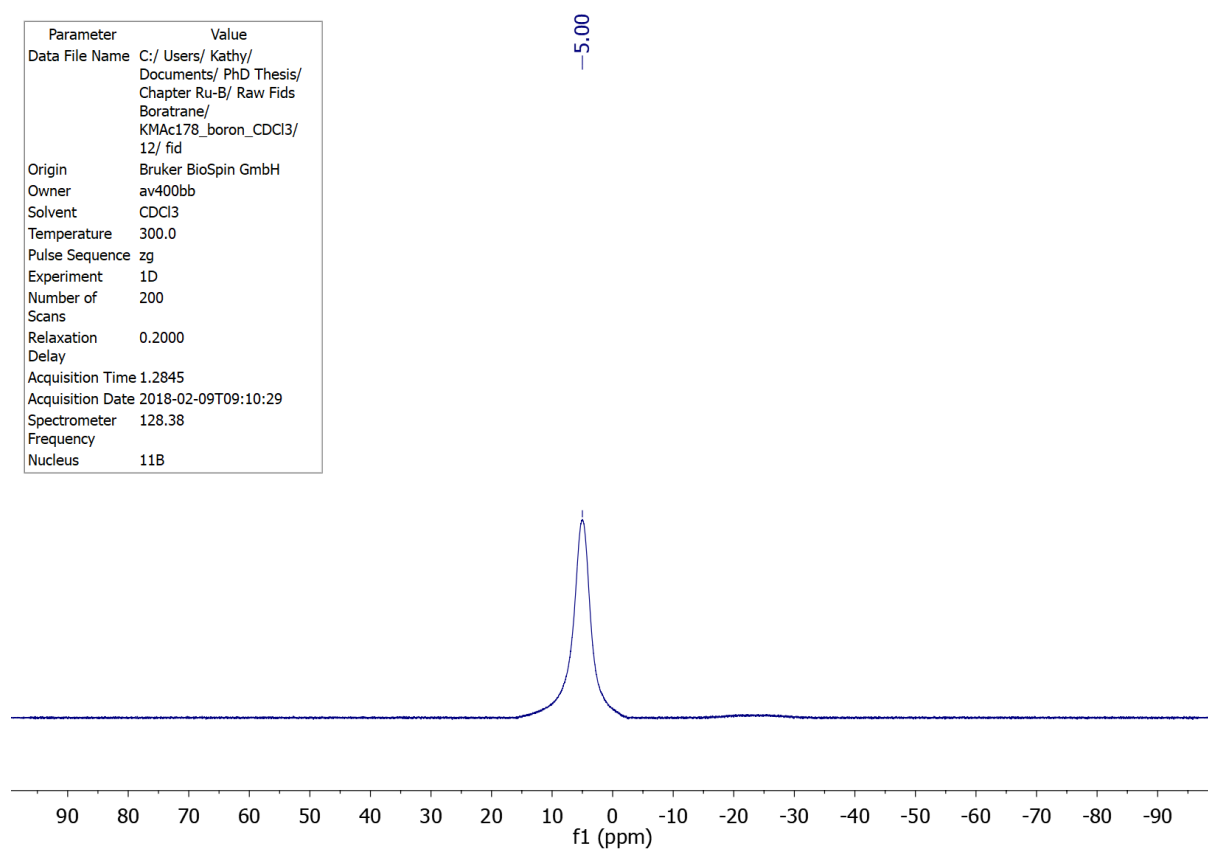

# [Ru{BH(mt)<sub>2</sub>}(CO){P(OMe)<sub>3</sub>}<sub>2</sub>] (15)

## <sup>1</sup>H NMR Spectrum of Complex 15

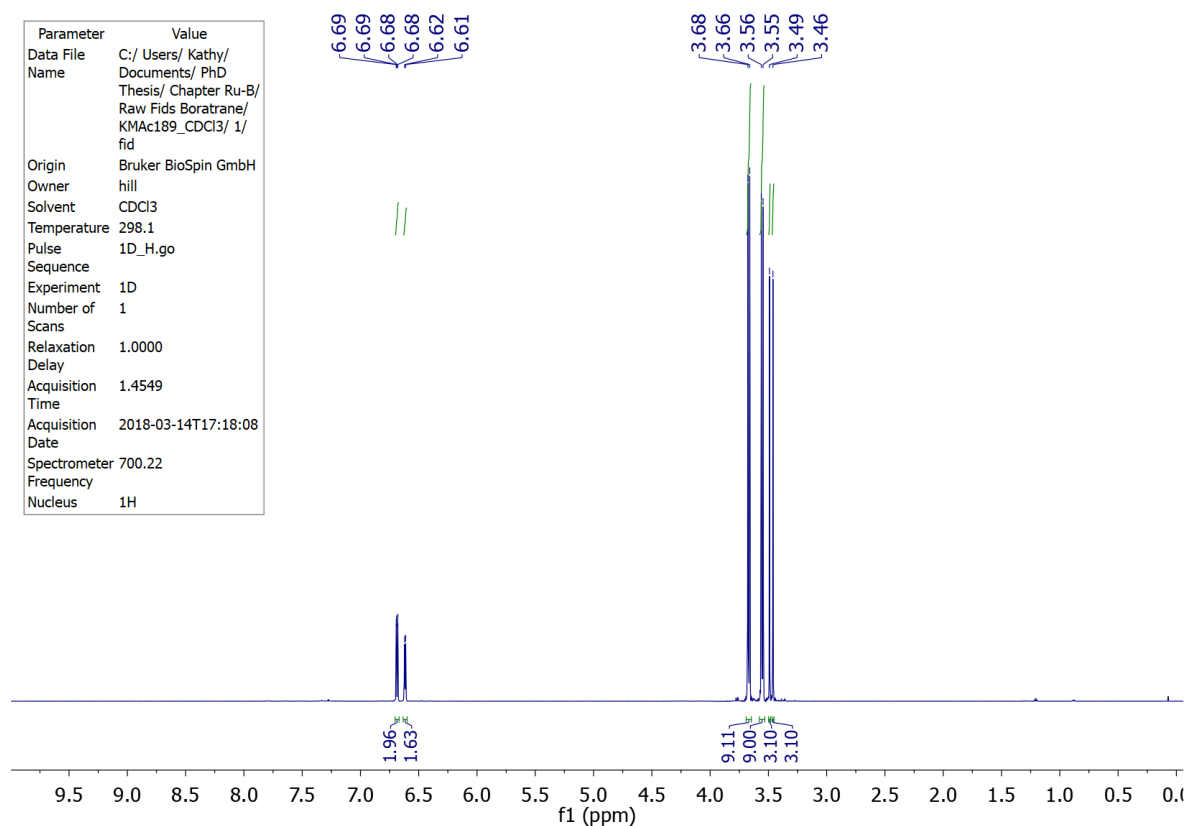

## <sup>13</sup>C{<sup>1</sup>H} NMR Spectrum of Complex 15

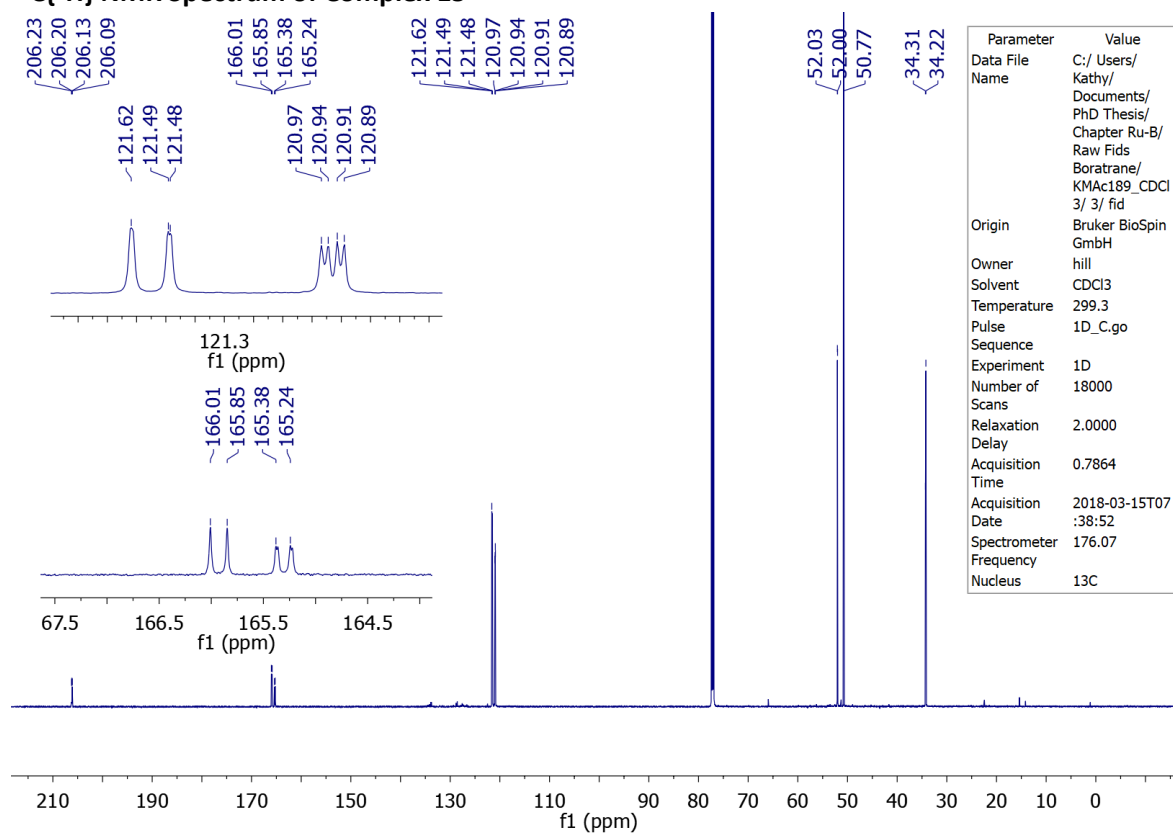

### $^{31}\text{P}\{^1\text{H}\}$ NMR Spectrum of Complex 15

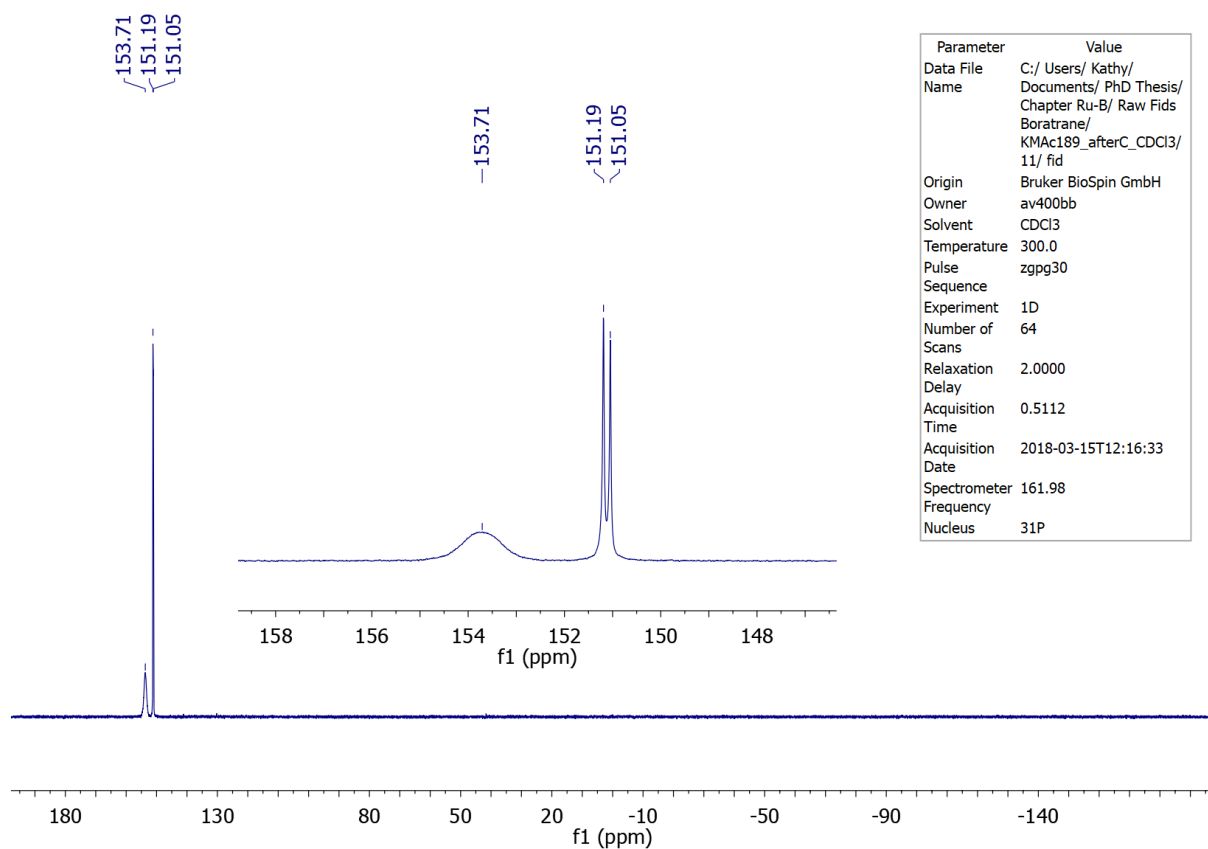

### $^{31}\text{P}$ NMR Spectrum of Complex 15

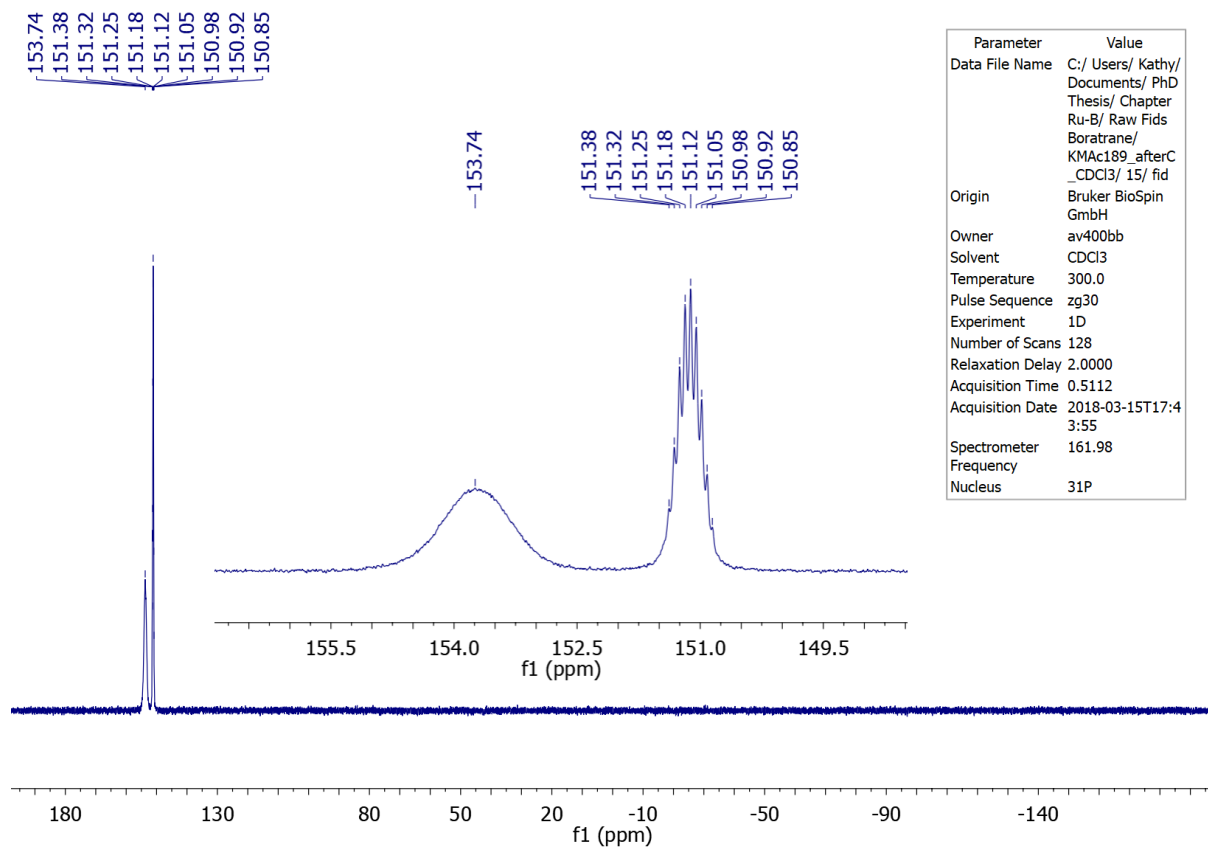

### $^{11}\text{B}\{^1\text{H}\}$ NMR Spectrum of Complex 15

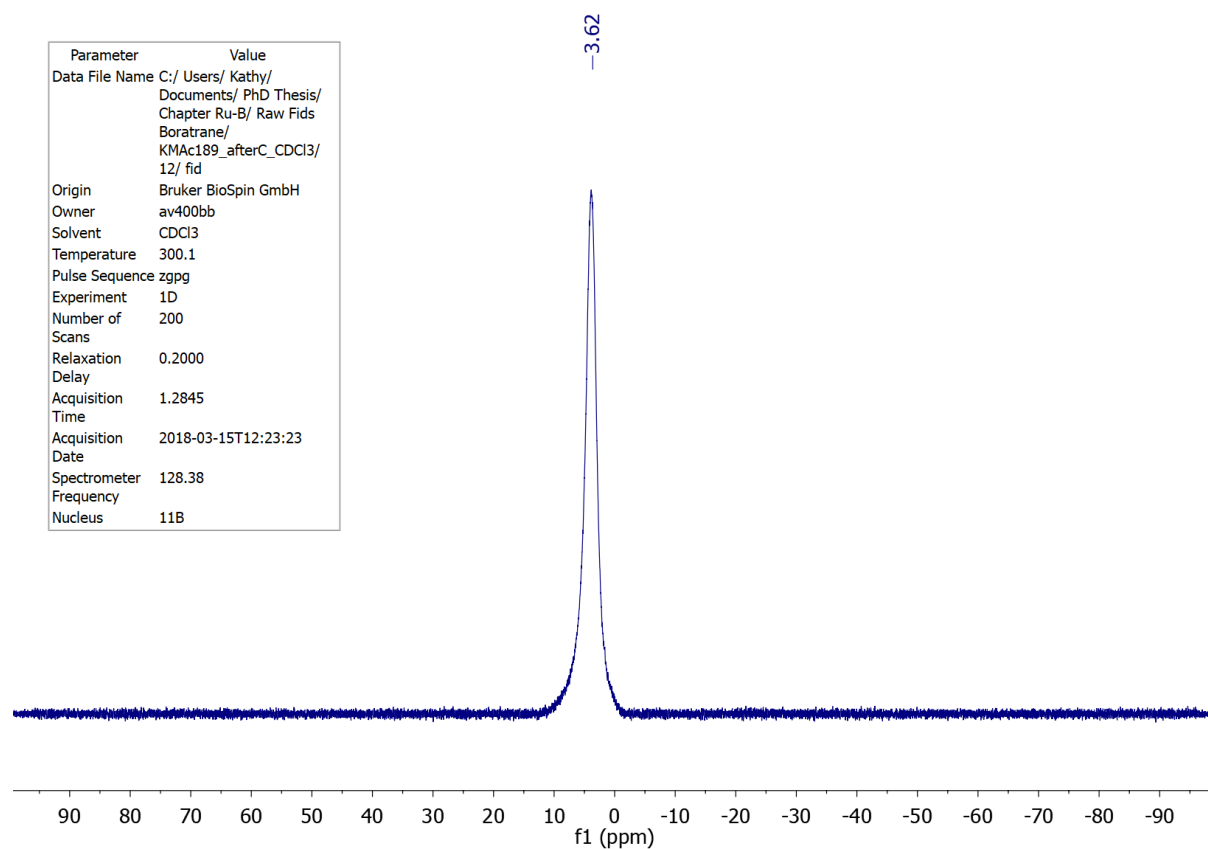

### $^{11}\text{B}$ NMR Spectrum of Complex 15

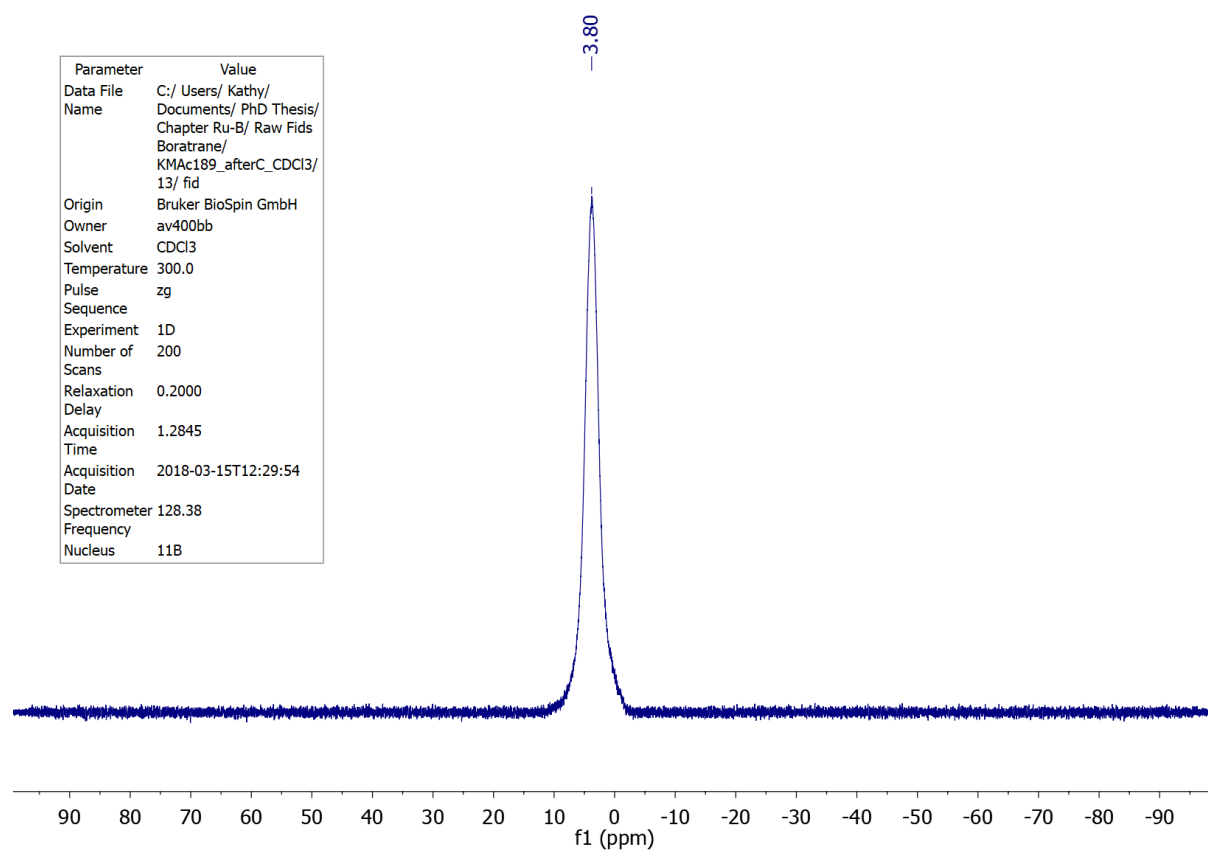



# [Ru{BH(mt)<sub>2</sub>}(CO)(Z-Ph<sub>2</sub>PCH=CHPPH<sub>2</sub>)] (16)

## <sup>1</sup>H NMR Spectrum of Complex 16

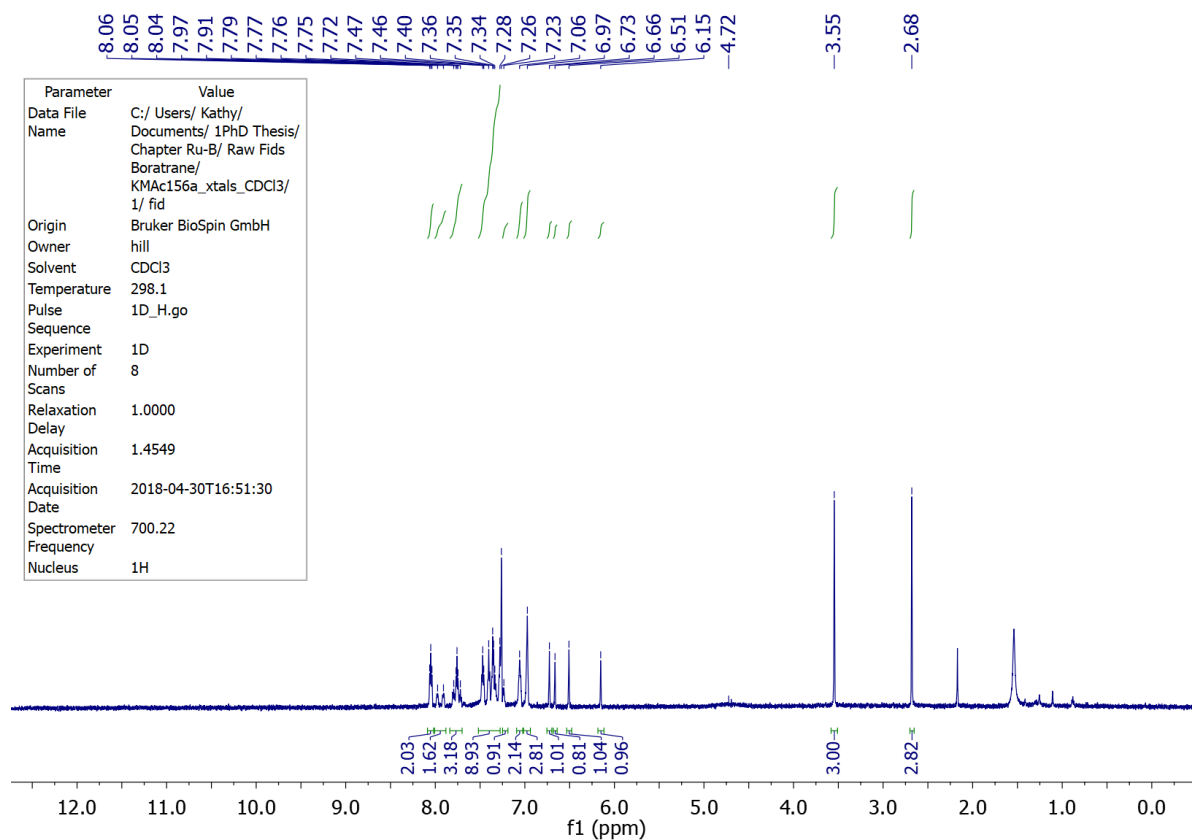

## <sup>13</sup>C{<sup>1</sup>H} NMR Spectrum of Complex 16

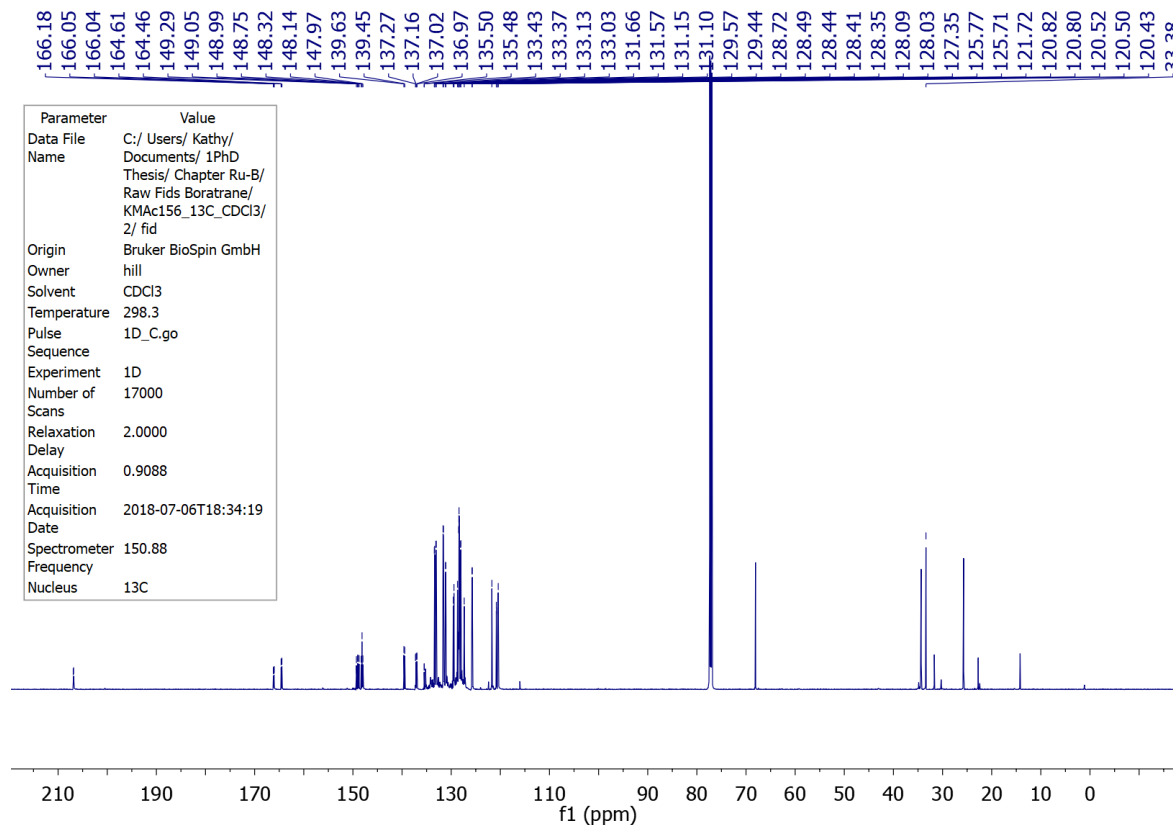

### $^{31}\text{P}\{^1\text{H}\}$ NMR Spectrum of Complex 16

| Parameter              | Value                                                                                               |
|------------------------|-----------------------------------------------------------------------------------------------------|
| Data File Name         | C:/Users/Kathy/Documents/1PhD Thesis/Chapter Ru-B/ Raw Fids/Boratrane/KMAc156_recryst_CDCl3/11/ fid |
| Origin                 | Bruker BioSpin GmbH                                                                                 |
| Owner                  | av400bb                                                                                             |
| Solvent                | CDCl3                                                                                               |
| Temperature            | 300.0                                                                                               |
| Pulse Sequence         | zgpg30                                                                                              |
| Experiment             | 1D                                                                                                  |
| Number of Scans        | 64                                                                                                  |
| Relaxation Delay       | 2.0000                                                                                              |
| Acquisition Time       | 0.5112                                                                                              |
| Acquisition Date       | 2018-07-06T18:06:28                                                                                 |
| Spectrometer Frequency | 161.98                                                                                              |
| Nucleus                | $^{31}\text{P}$                                                                                     |

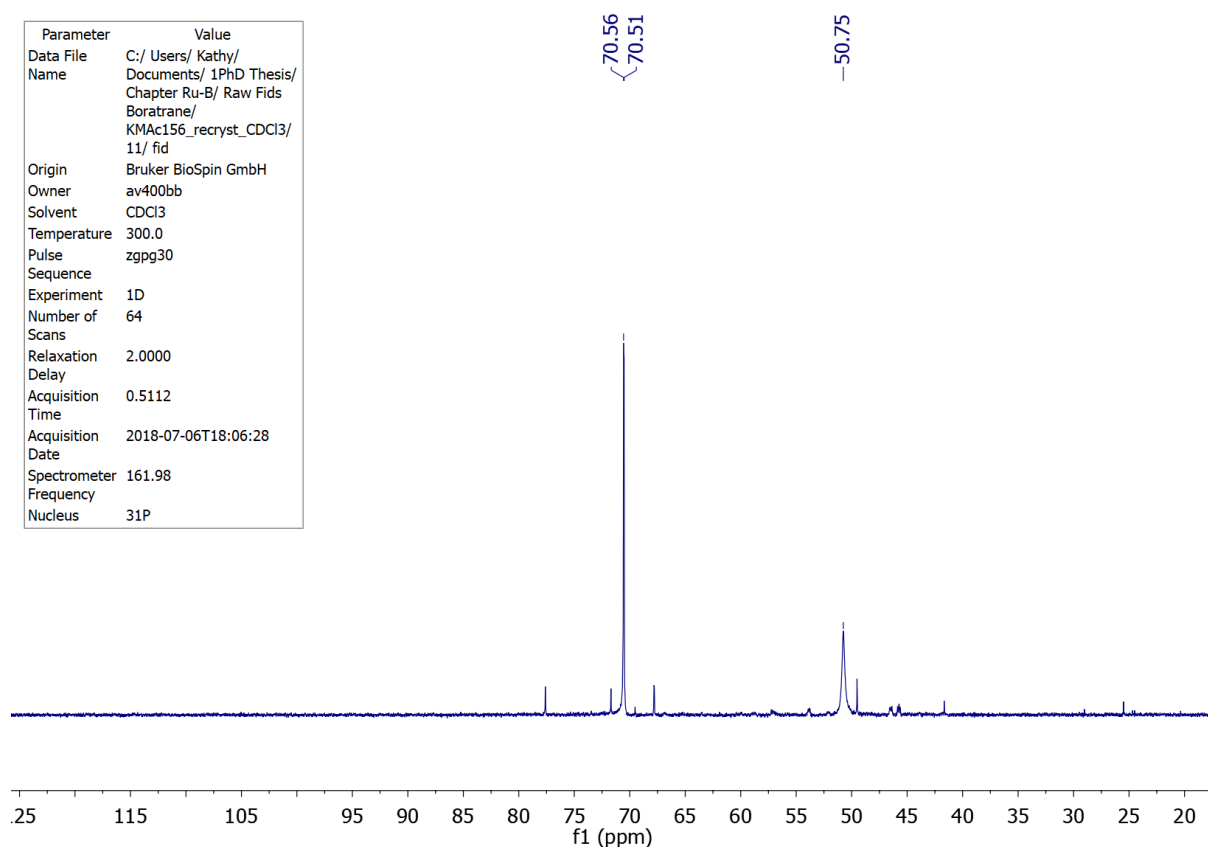

### $^{11}\text{B}\{^1\text{H}\}$ NMR Spectrum of Complex 16

| Parameter              | Value                                                                                               |
|------------------------|-----------------------------------------------------------------------------------------------------|
| Data File Name         | C:/Users/Kathy/Documents/1PhD Thesis/Chapter Ru-B/ Raw Fids/Boratrane/KMAc156_recryst_CDCl3/12/ fid |
| Origin                 | Bruker BioSpin GmbH                                                                                 |
| Owner                  | av400bb                                                                                             |
| Solvent                | CDCl3                                                                                               |
| Temperature            | 300.0                                                                                               |
| Pulse Sequence         | zgpg                                                                                                |
| Experiment             | 1D                                                                                                  |
| Number of Scans        | 200                                                                                                 |
| Relaxation Delay       | 0.2000                                                                                              |
| Acquisition Time       | 1.2845                                                                                              |
| Acquisition Date       | 2018-07-06T18:13:22                                                                                 |
| Spectrometer Frequency | 128.38                                                                                              |
| Nucleus                | $^{11}\text{B}$                                                                                     |

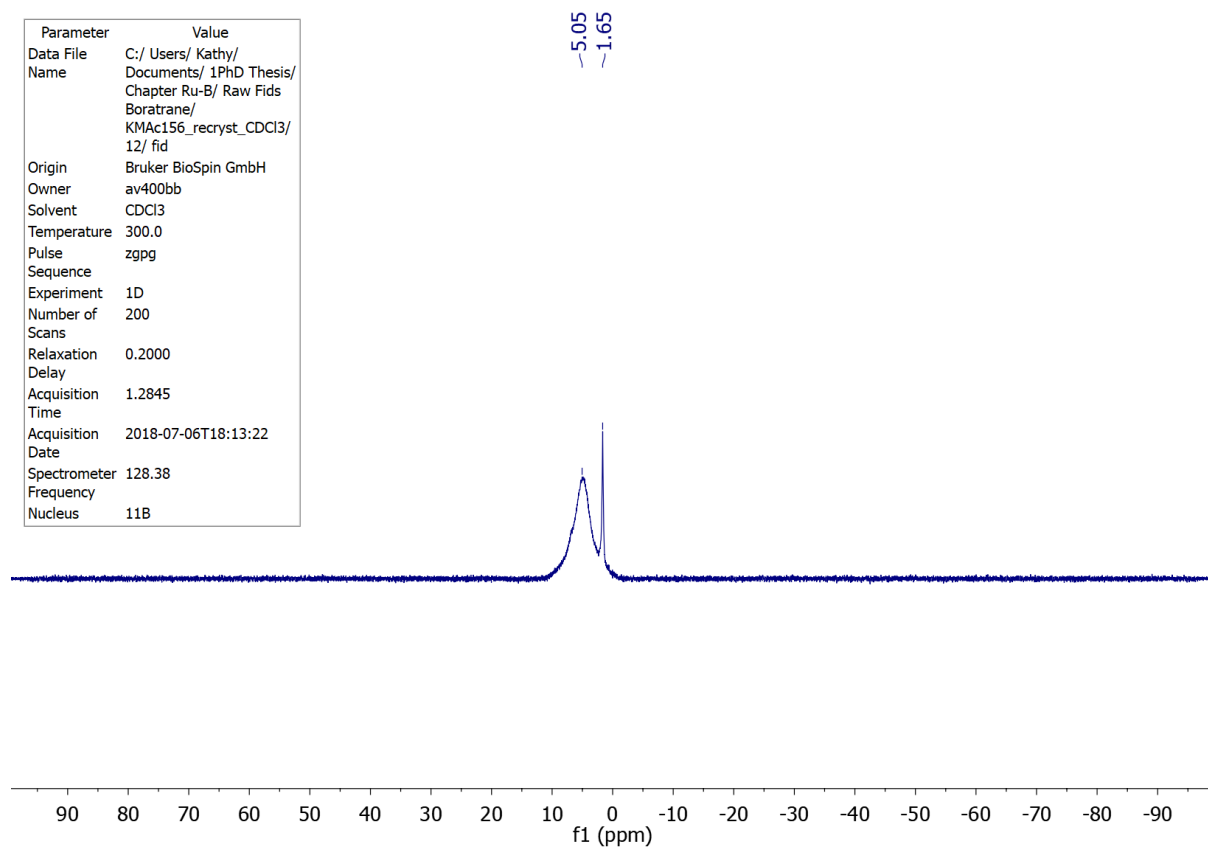

Supplement: c8dt04813d1.pdf [file c8dt04813d1.pdf]
